# Supplementary material for: Synergistic ramifications of synthesis criteria and amine functionalization of UiO-66-NH2 MOFs for the catalytic degradation of a nerve agent simulant, methyl-paraoxon
Source: Royal Society of Chemistry journal article supplement (doi:10.1039/d4nj02434f), 2024-01-01
Supplement: d4nj02434f1.pdf [file d4nj02434f1.pdf]

1 Supporting Information for Publication

2 **Synergistic Ramification of Synthesis Criterion and Amine Functionalization of UiO-66-**  
3 **NH<sub>2</sub> MOFs for the Catalytic Degradation of Nerve Agent Simulant: Methyl-paraoxon**

4 Selva Balasubramanian <sup>a,b</sup>, Arockia Jayalatha Kulandaisamy <sup>b</sup> and John Bosco Balaguru  
5 Rayappan <sup>a,b\*</sup>

6 <sup>a</sup>Centre for Nanotechnology & Advanced Biomaterials (CeNTAB), SASTRA Deemed  
7 University, Thanjavur, Tamil Nadu - 613 401, India

8 <sup>b</sup>School of Electrical & Electronics Engineering (SEEE), SASTRA Deemed University  
9 Thanjavur, Tamil Nadu - 613 401, India

10

11

12

13

14

15

16 -----

17 \*Corresponding Author

18 John Bosco Balaguru Rayappan, Ph.D.

19 Centre for Nanotechnology & Advanced Biomaterials (CeNTAB) &

20 School of Electrical & Electronics Engineering

21 SASTRA Deemed University

22 Thanjavur – 613 401, Tamil Nadu, India

23 Phone: +91 4362 350 009; Ext: 2255

24 Fax: +91 4362 264 120

25 Email: [rjbosco@ece.sastra.edu](mailto:rjbosco@ece.sastra.edu)

1 Table S1. Synthesis parameters of UiO-66-NH<sub>2</sub> MOFs

2

| S. No. | Sample | ZrCl <sub>4</sub><br>(mmol) | H <sub>2</sub> BDC-NH <sub>2</sub><br>(mmol)                                        | Modulator<br>(Equivalence) | Synthesis<br>Temperature<br>(°C) | Duration<br>(h) |
|--------|--------|-----------------------------|-------------------------------------------------------------------------------------|----------------------------|----------------------------------|-----------------|
| 1.     | UN1    | 6 mmol                      | 8.4 mmol                                                                            | 8**                        | 80                               | 24              |
| 2.     | UN2    | 6 mmol                      | 8.4 mmol                                                                            | 8***                       | 80                               | 24              |
| 3.     | UN3    | 6 mmol                      | 8.4 mmol                                                                            | 8*                         | 80                               | 24              |
| 4.     | UN4    | 6 mmol                      | 8.4 mmol                                                                            | 8*                         | 100                              | 24              |
| 5.     | UN5    | 6 mmol                      | 8.4 mmol                                                                            | 8*                         | 120                              | 24              |
| 6.     | UN6    | 6 mmol                      | 8.4 mmol                                                                            | 4*                         | 80                               | 24              |
| 7.     | UN7    | 6 mmol                      | 8.4 mmol                                                                            | 12*                        | 80                               | 24              |
| 8.     | UN8    | 6 mmol                      | 6.3 H <sub>2</sub> BDC +<br>2.1 H <sub>2</sub> BDC-<br>NH <sub>2</sub> <sup>#</sup> | 6*                         | 80                               | 24              |
| 9.     | UN9    | 6 mmol                      | 4.2 H <sub>2</sub> BDC +<br>4.2 H <sub>2</sub> BDC-<br>NH <sub>2</sub> <sup>#</sup> | 6*                         | 80                               | 24              |
| 10.    | UN10   | 6 mmol                      | 2.1 H <sub>2</sub> BDC +<br>6.3 H <sub>2</sub> BDC-<br>NH <sub>2</sub> <sup>#</sup> | 6*                         | 80                               | 24              |

3

4 \* HCl, \*\* Acetic acid, \*\*\* Formic acid, # Mixed-ligand approach (H<sub>2</sub>BDC + H<sub>2</sub>BDC-NH<sub>2</sub>)

5

6

7

8

9

10

11

12

13

14

15

16

17

2

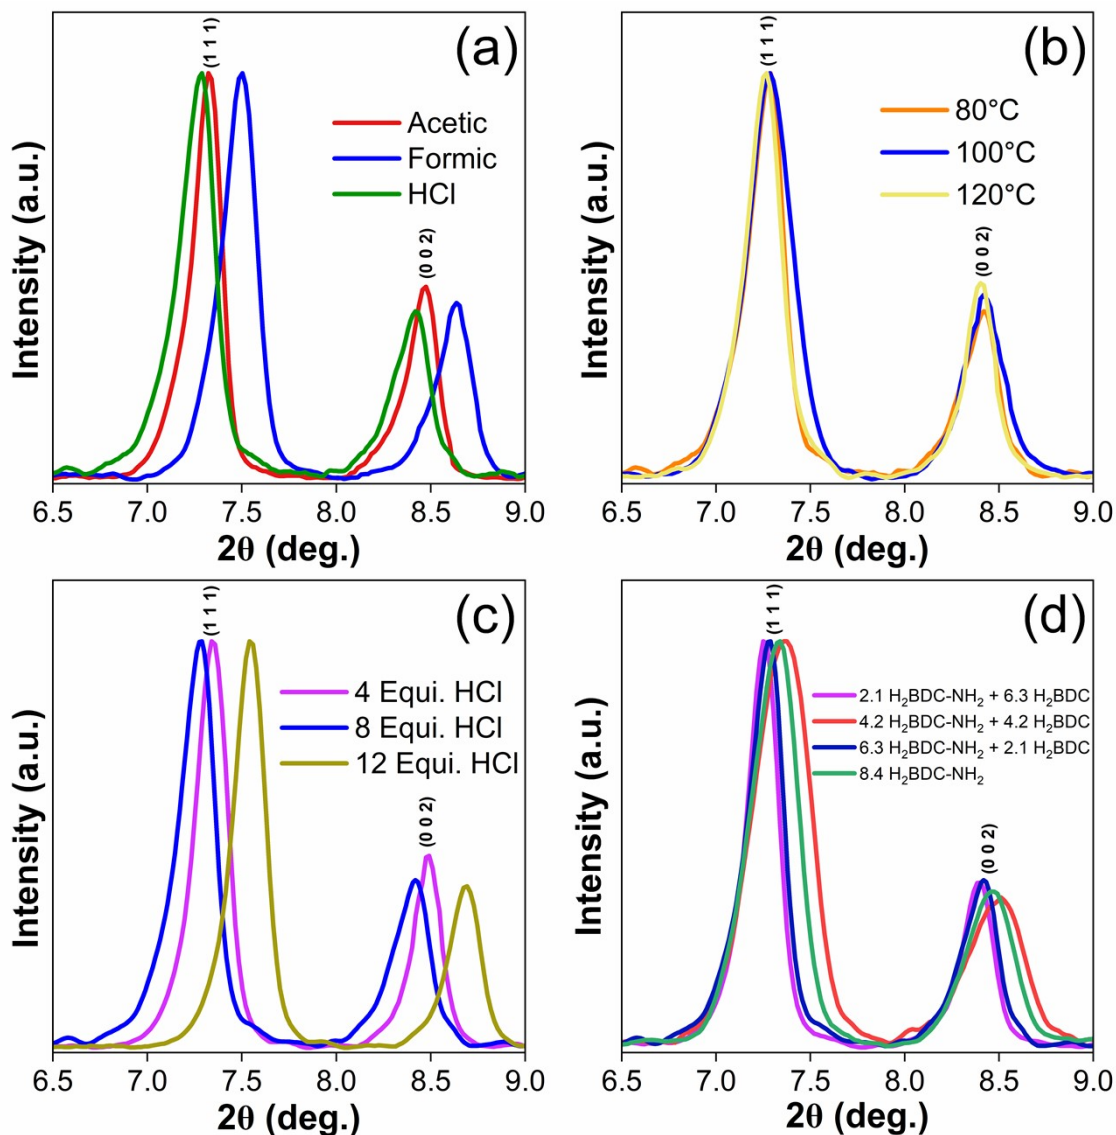

6 Fig. S1. Changes in the PXRD pattern of UiO-66-NH<sub>2</sub> samples with respect to its synthesis  
 7 condition: (a) modulators, (b) synthesis temperature, (c) HCl equivalence, and (d) ligand  
 8 composition.

9

10

11

12

13

1 Table S2. Calculated lattice parameter values from PXRD analysis.

| <b>Sample</b> | <b>Crystallite size (nm)</b> | <b>Lattice constant "a" (Å)</b> | <b>Microstrain (<math>\epsilon</math>)</b> | <b>Dislocation density (<math>10^{-4}</math>)</b> |
|---------------|------------------------------|---------------------------------|--------------------------------------------|---------------------------------------------------|
| UN1           | 41                           | 20.78                           | 0.70                                       | 6.20                                              |
| UN2           | 40                           | 20.56                           | 0.71                                       | 6.55                                              |
| UN3           | 41                           | 20.85                           | 0.70                                       | 5.97                                              |
| UN4           | 39                           | 20.73                           | 0.73                                       | 6.60                                              |
| UN5           | 41                           | 20.78                           | 0.71                                       | 6.23                                              |
| UN6           | 39                           | 20.83                           | 0.74                                       | 6.61                                              |
| UN7           | 36                           | 20.76                           | 0.81                                       | 7.68                                              |
| UN8           | 42                           | 20.71                           | 0.68                                       | 5.72                                              |
| UN9           | 39                           | 20.84                           | 0.75                                       | 6.70                                              |
| UN10          | 39                           | 20.88                           | 0.75                                       | 6.80                                              |

2  
3  
4  
5  
6  
7  
8  
9  
10  
11  
12  
13  
14  
15  
16  
17  
18

1 Section S2: Morphological studies

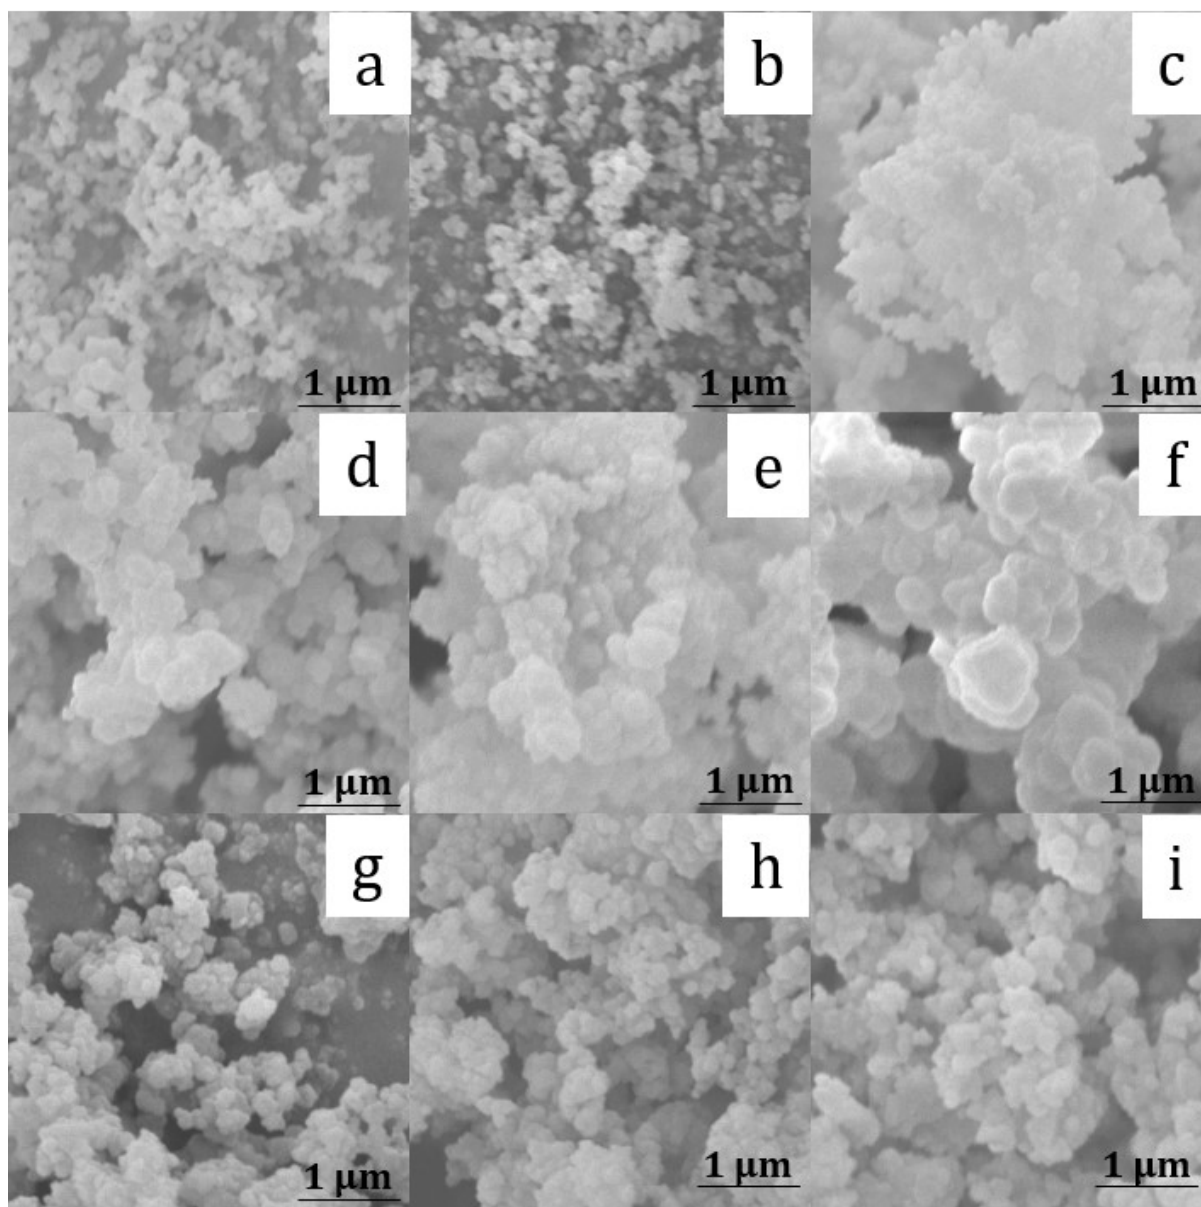

2

3

4 Fig. S2. SEM pictures of UiO-66-NH<sub>2</sub> samples with respect to their synthesis condition: (a)  
5 AA modulation, (b) FA modulation, (c) 4 equi. HCl, (d) 12 equi. HCl, (e) 100°C synthesis  
6 temperature, (f) 120°C synthesis temperature, (g) 2.1 mmol NH<sub>2</sub>-H<sub>2</sub>BDC (25% amine), (h) 4.2  
7 mmol NH<sub>2</sub>-H<sub>2</sub>BDC (50% amine), and (i) 6.3 mmol NH<sub>2</sub>-H<sub>2</sub>BDC (75% amine).

8

9

10

11

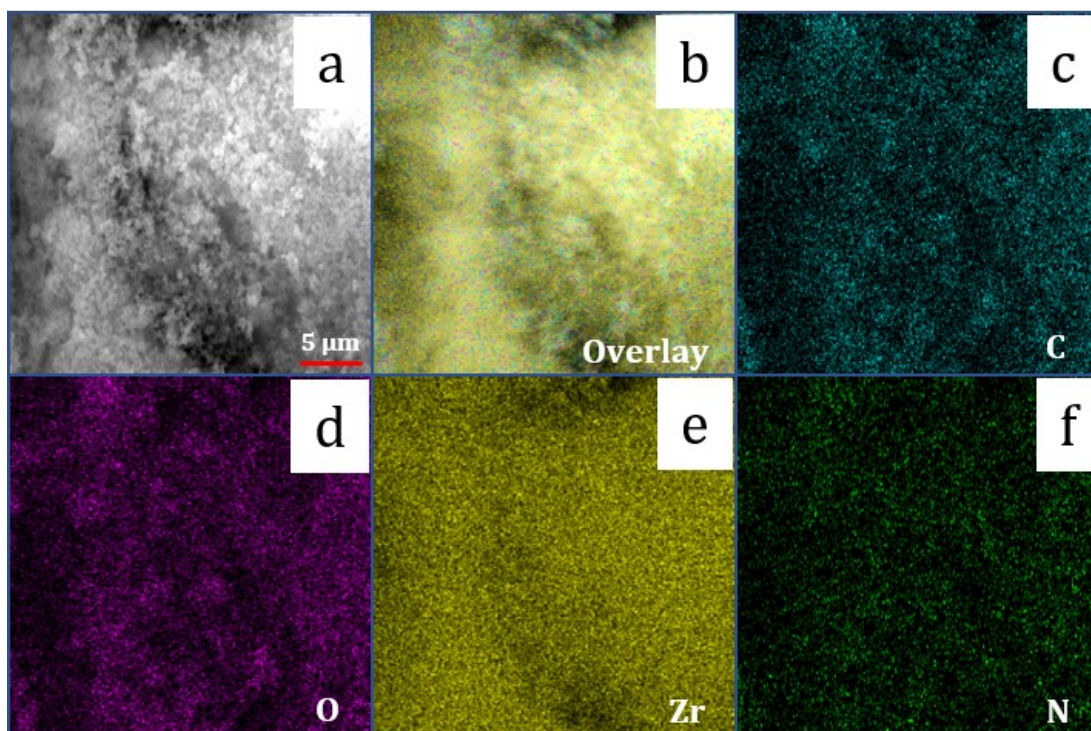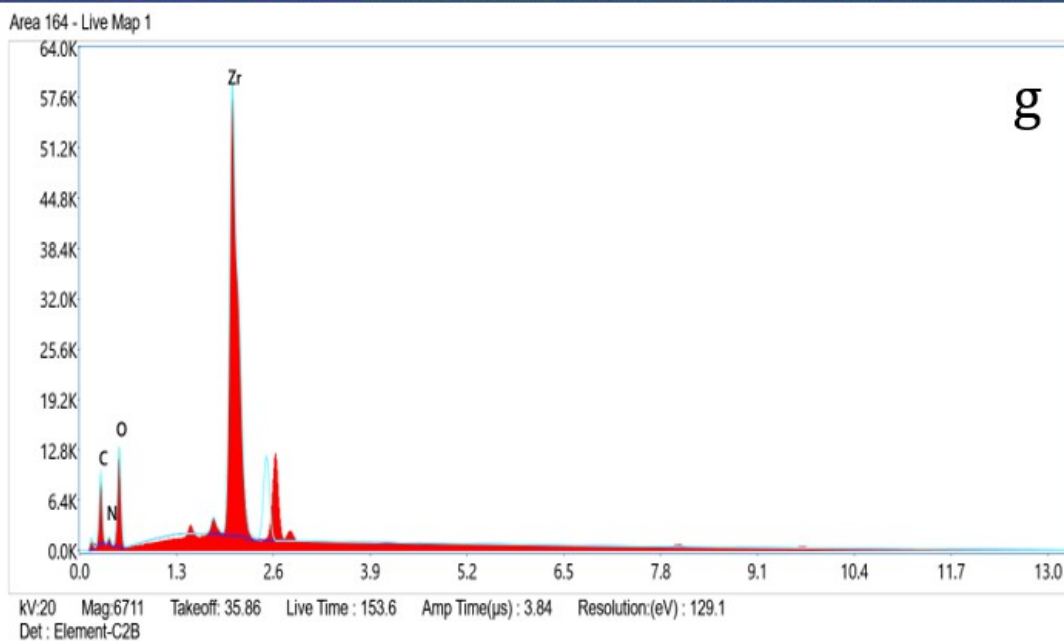

1

2

3 Fig. S3. EDS and elemental mapping of acetic acid modulated UiO-66-NH<sub>2</sub> sample (UN1)  
4 synthesized at 80°C.

5

6

7

8

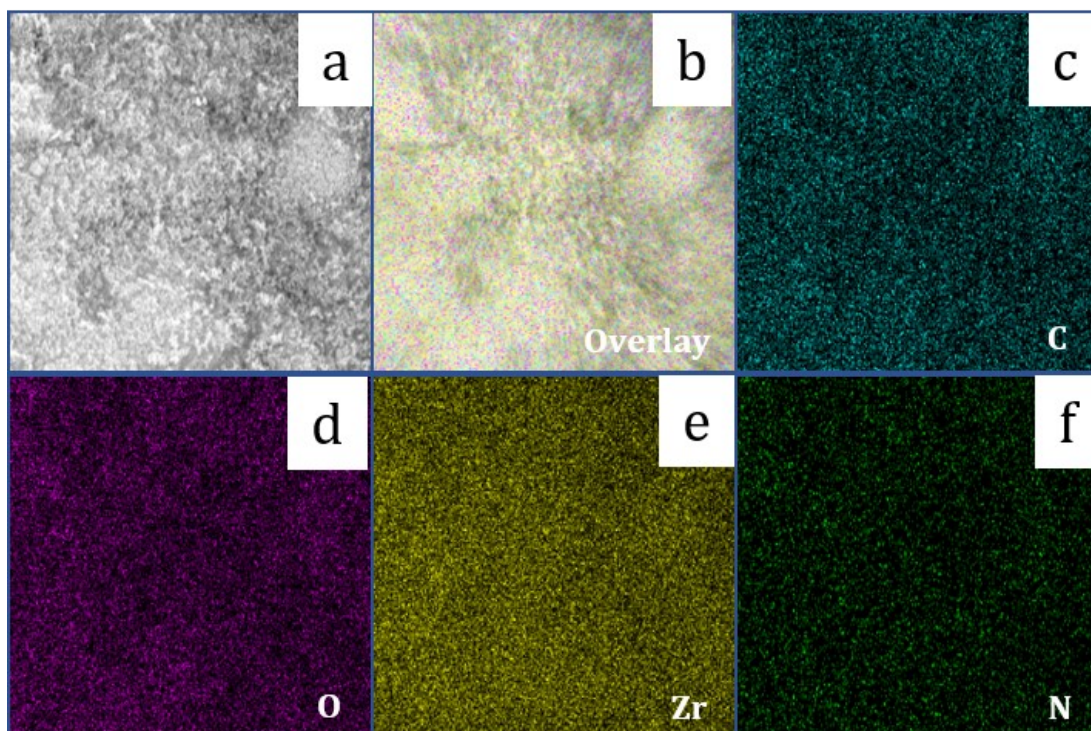

Area 163 - Live Map 1

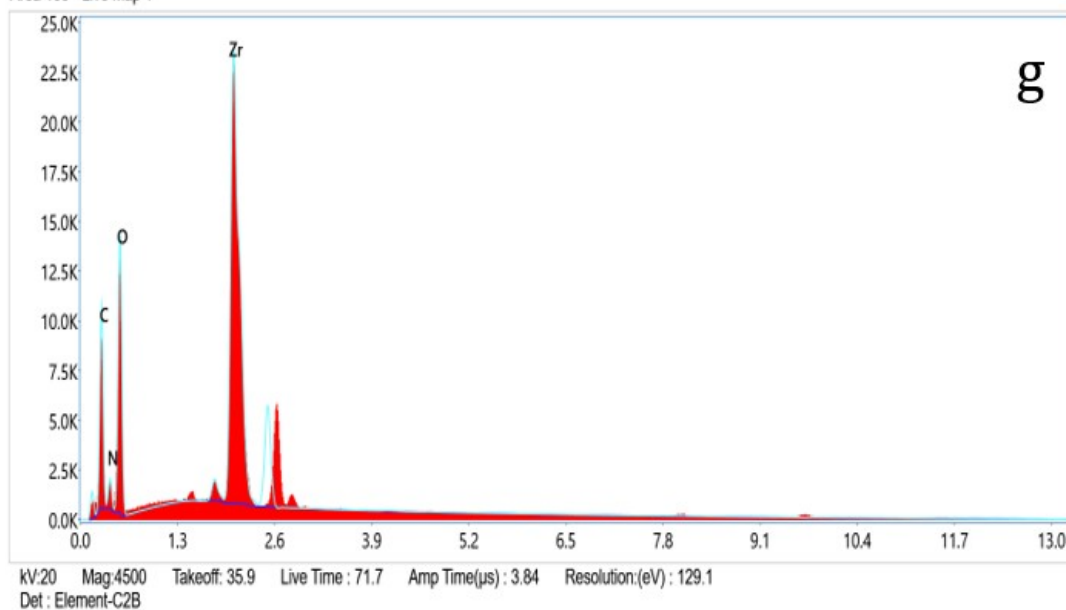

1

2

3 Fig. S4. EDS and elemental mapping of formic acid modulated UiO-66-NH<sub>2</sub> sample (UN2)  
 4 synthesized at 80°C.

5

6

7

8

1

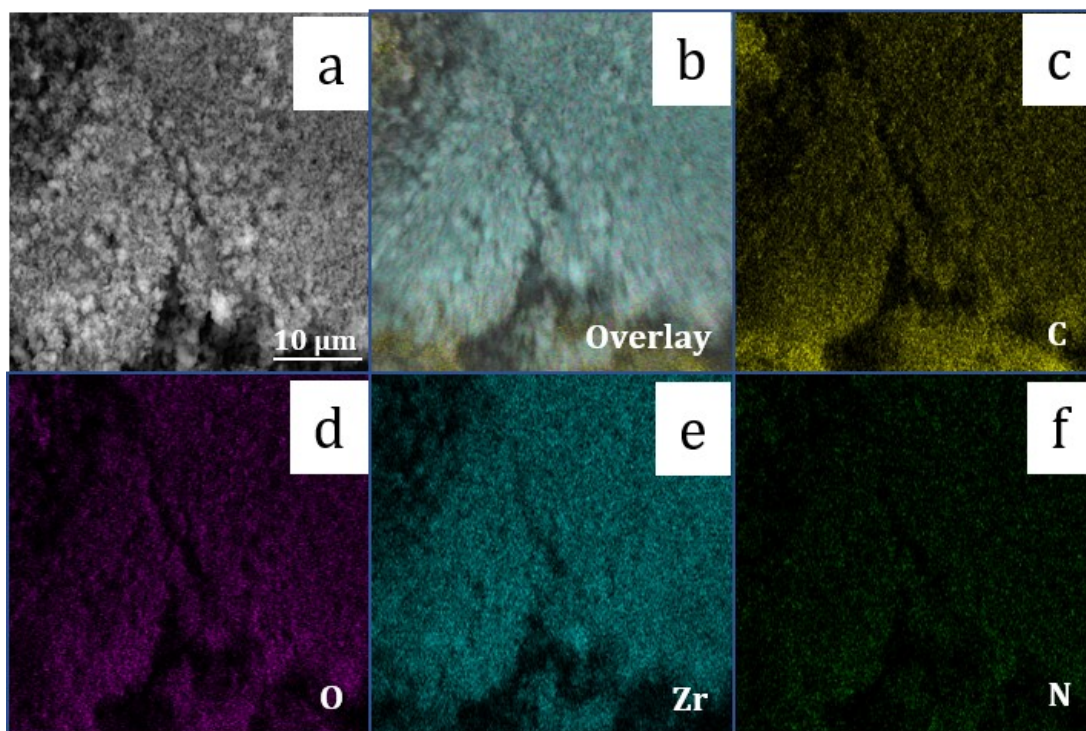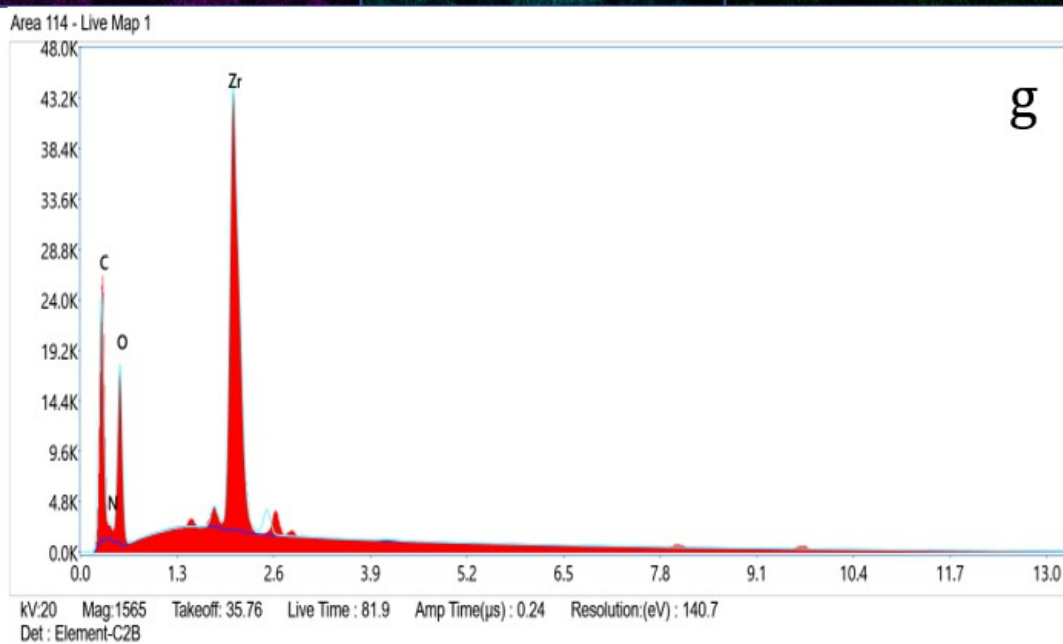

2

3

4 Fig. S5. EDS and elemental mapping of HCl modulated UiO-66-NH<sub>2</sub> sample (UN3)  
5 synthesized at 80°C.

6

7

8



1

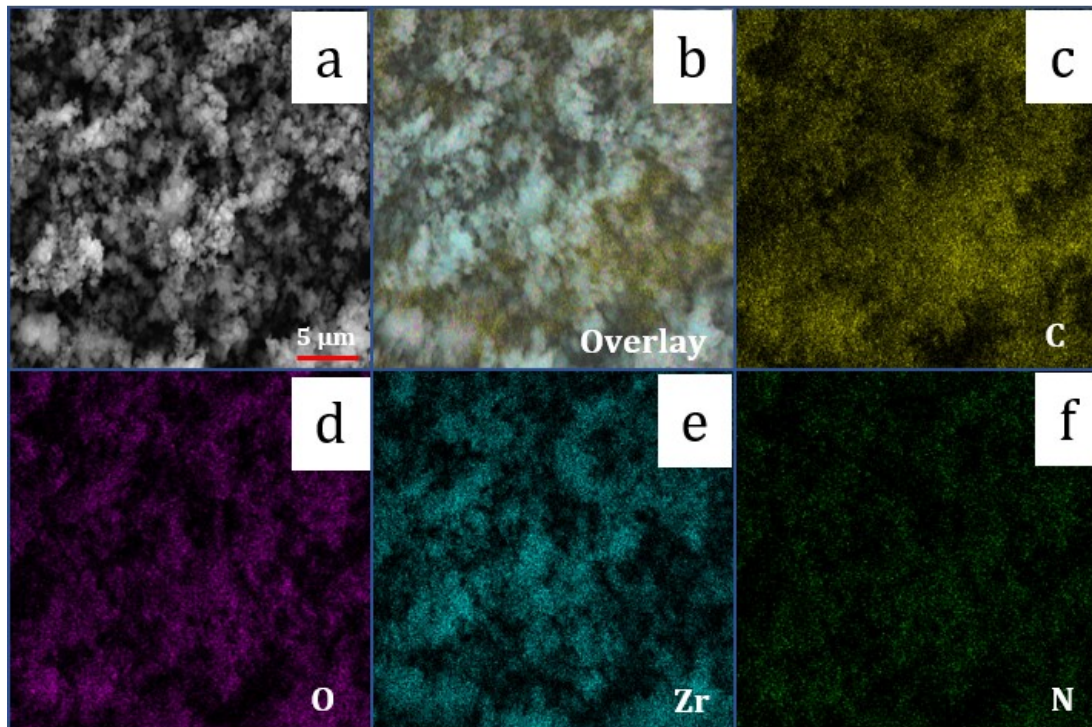

Area 115 - Live Map 1

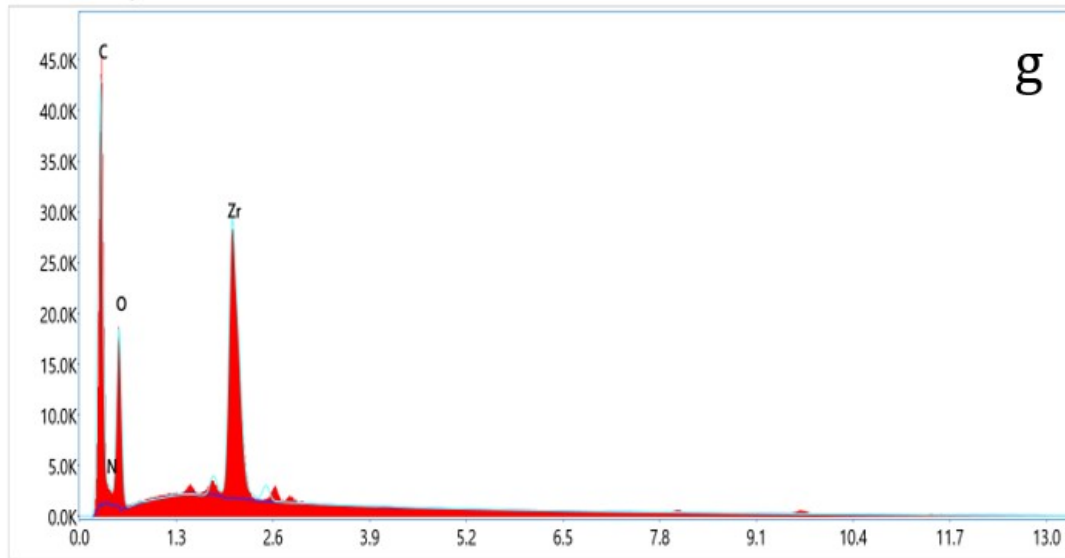

KV:20 Mag:2422 Takeoff: 35.6 Live Time : 81.9 Amp Time(μs) : 0.24 Resolution:(eV) : 140.7  
Det : Element-C2B

2

3 Fig. S6. EDS and elemental mapping of HCl modulated UiO-66-NH<sub>2</sub> sample (UN4)  
4 synthesized at 100°C.

5

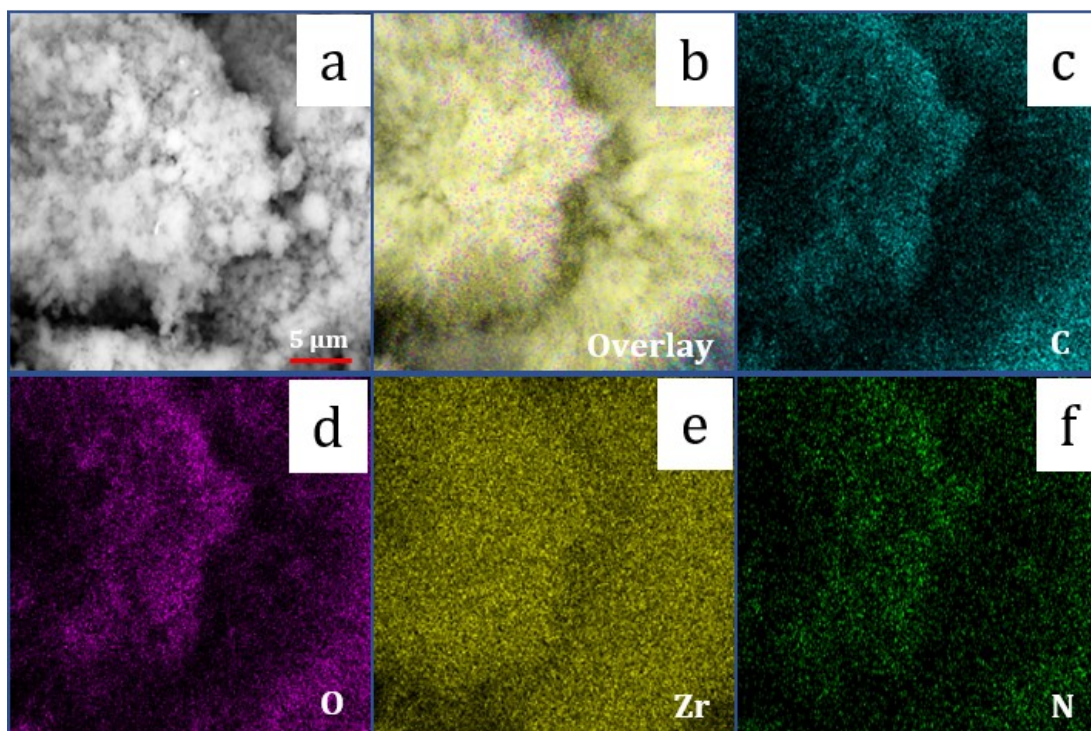

Area 162 - Live Map 1

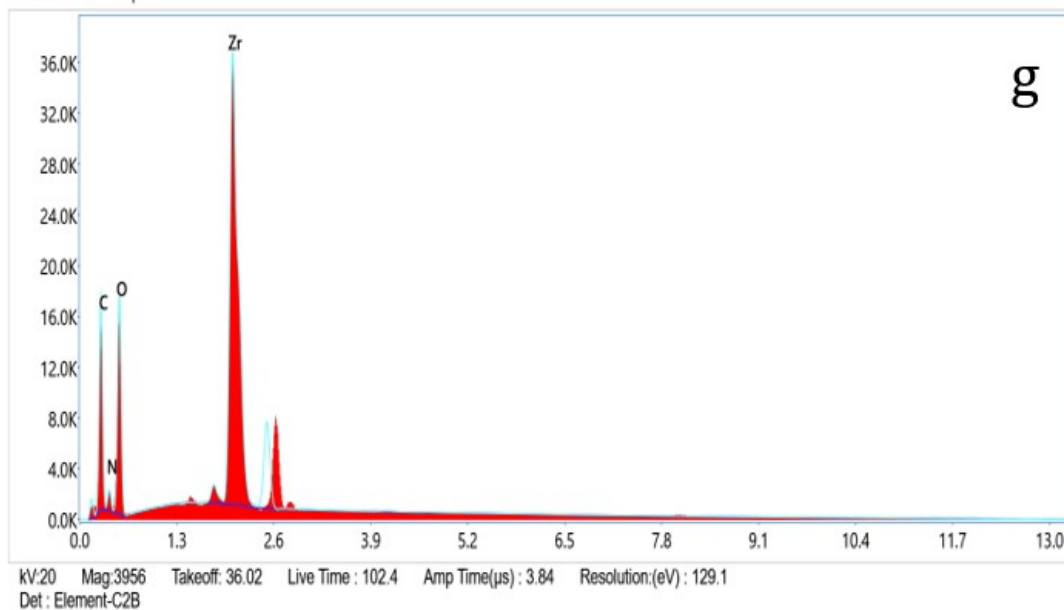

1

2

3 Fig. S7. EDS and elemental mapping of 4 equivalence HCl modulated UiO-66-NH<sub>2</sub> sample  
4 (UN6) synthesized at 80°C.

5

6

7

8

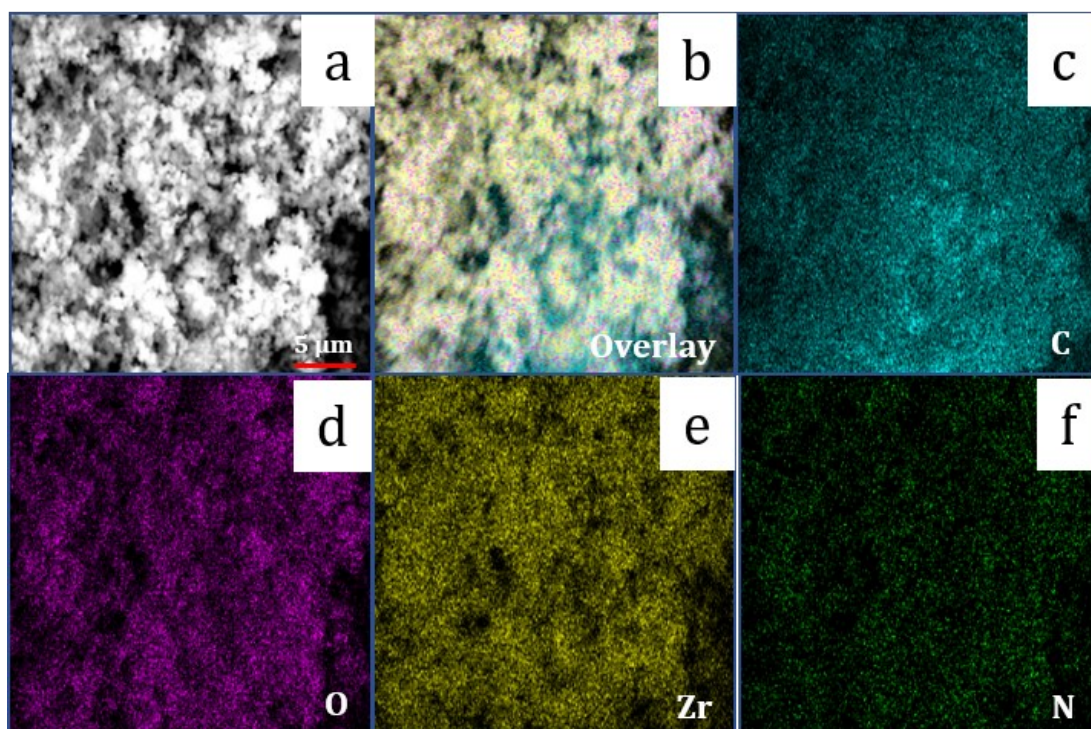

Area 161 - Live Map 1

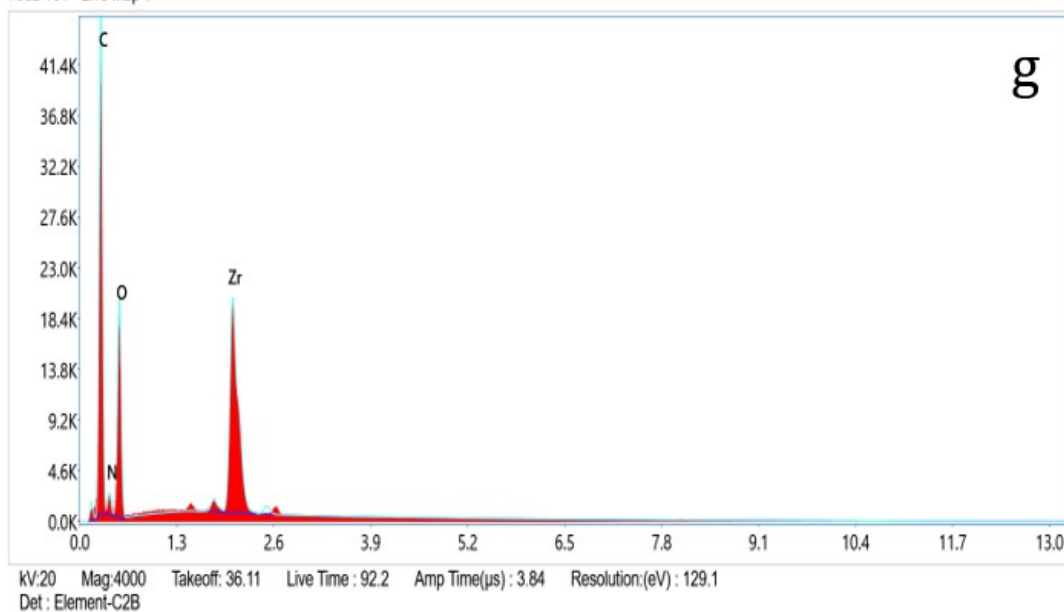

1

2

3 Fig. S8. EDS and elemental mapping of 12 equivalence HCl modulated UiO-66-NH<sub>2</sub> sample  
 4 (UN7) synthesized at 80°C.

5

6

7

8

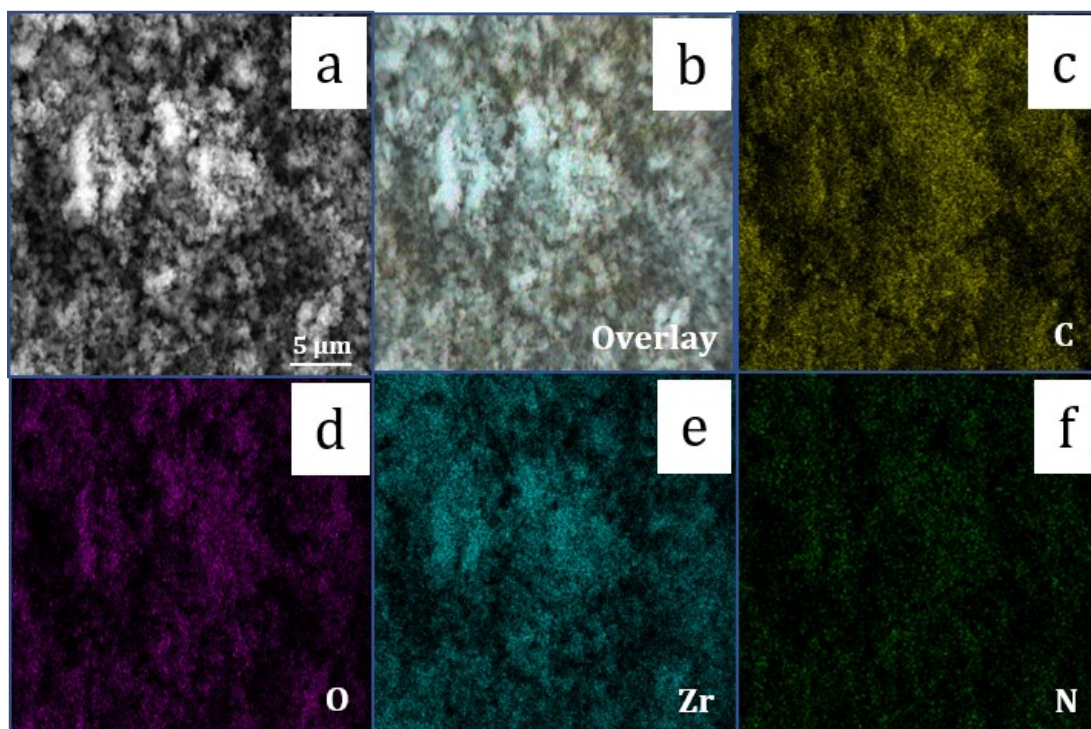

Area 111 - Live Map 1

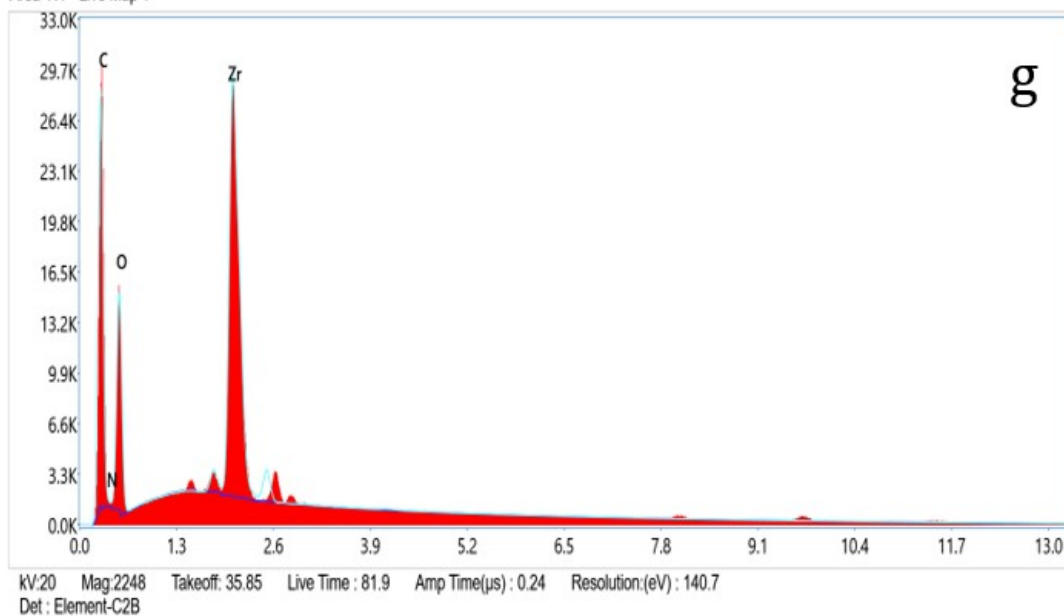

1

2

3 Fig. S9. EDS and elemental mapping of 8 equivalence HCl modulated UiO-66-NH<sub>2</sub> sample  
4 (UN8) synthesized at 80°C.

5

6

7

8

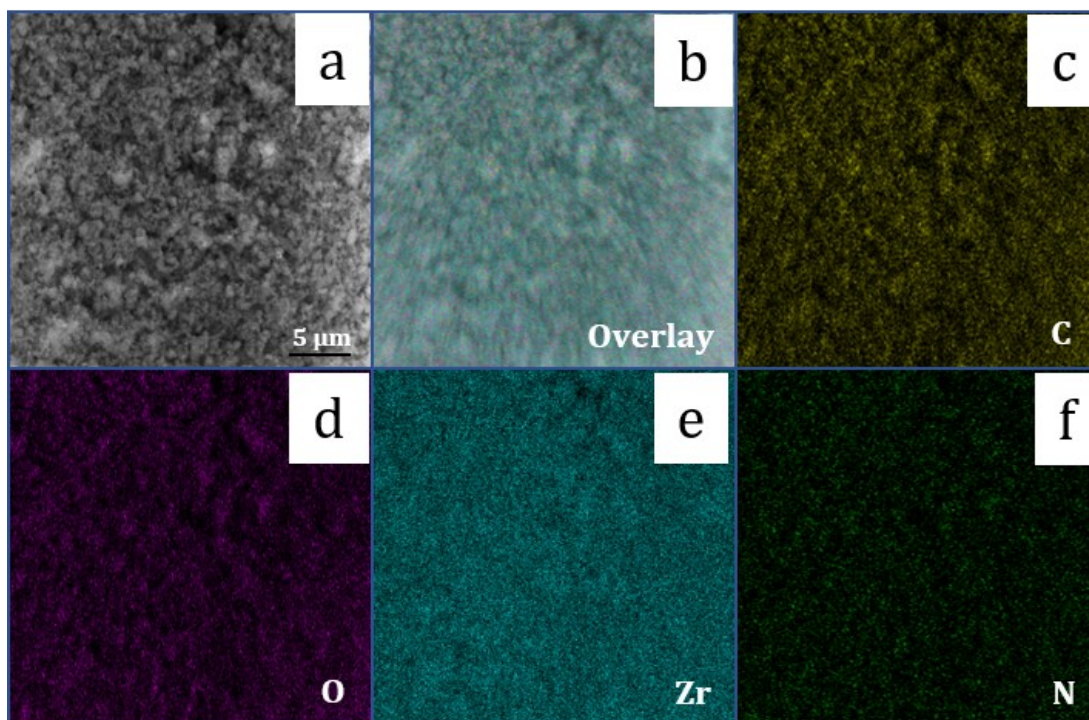

Area 112 - Live Map 1

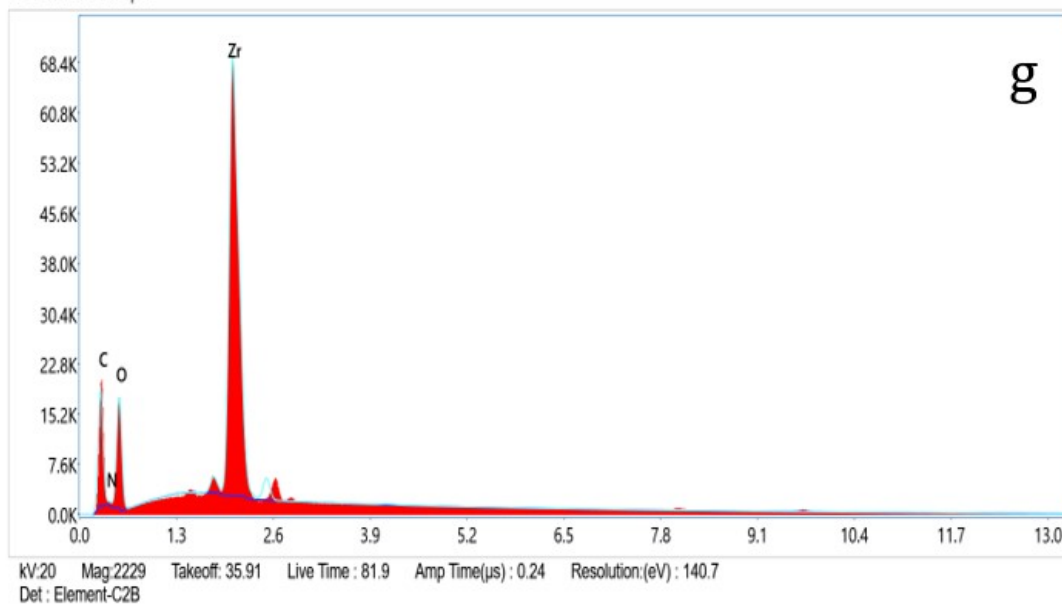

1  
2  
3  
4  
5  
6  
7  
8

Fig. S10. EDS and elemental mapping of 8 equivalence HCl modulated UiO-66-NH<sub>2</sub> sample (UN9) synthesized at 80°C.

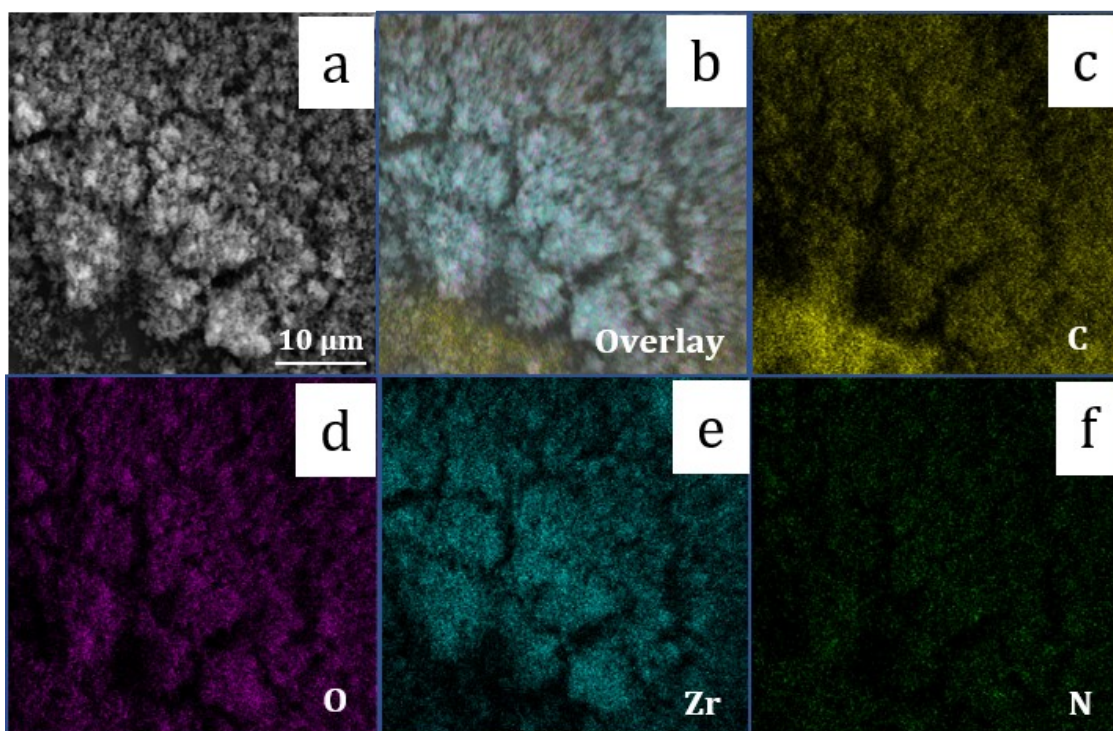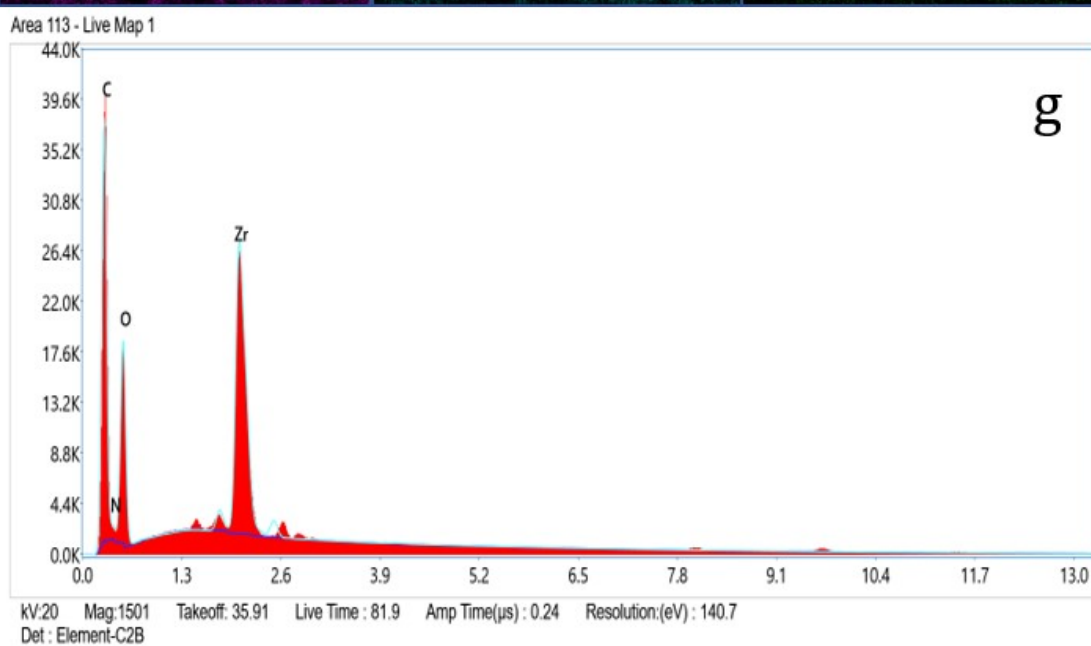

1

2

3 Fig. S11. EDS and elemental mapping of 8 equivalence HCl modulated UiO-66-NH<sub>2</sub> sample  
 4 (UN10) synthesized at 80°C.

5

6

7

1 Table S3. Observed atomic percentage values of UiO-66-NH<sub>2</sub> samples from elemental  
 2 mapping.

| Sample Description                             | Atomic Percentage (%) |        |           |          |
|------------------------------------------------|-----------------------|--------|-----------|----------|
|                                                | Carbon                | Oxygen | Zirconium | Nitrogen |
| UN1 - Acetic acid                              | 61.42                 | 27.23  | 5.91      | 5.44     |
| UN2 - Formic acid                              | 55.94                 | 32.08  | 2.66      | 9.31     |
| UN6 - 4 Equi. HCl                              | 62.10                 | 27.71  | 2.79      | 7.39     |
| UN3 - 8 Equi. HCl                              | 70.23                 | 21.73  | 1.83      | 6.21     |
| UN7 - 12 Equi. HCl                             | 71.49                 | 21.44  | 0.95      | 6.12     |
| UN4 - 100°C                                    | 74.87                 | 18.26  | 0.92      | 5.96     |
| UN5 -120°C                                     | 76.16                 | 17.17  | 0.67      | 6.00     |
| UN8 - 2.1 NH <sub>2</sub> -H <sub>2</sub> BDC  | 77.29                 | 20.05  | 1.30      | 1.36     |
| UN9 - 4.2 NH <sub>2</sub> -H <sub>2</sub> BDC  | 71.30                 | 22.57  | 3.06      | 3.07     |
| UN10 - 6.3 NH <sub>2</sub> -H <sub>2</sub> BDC | 74.46                 | 19.95  | 0.95      | 4.64     |

Section  
 S3:  
 FTIR  
 R  
 analysis

13

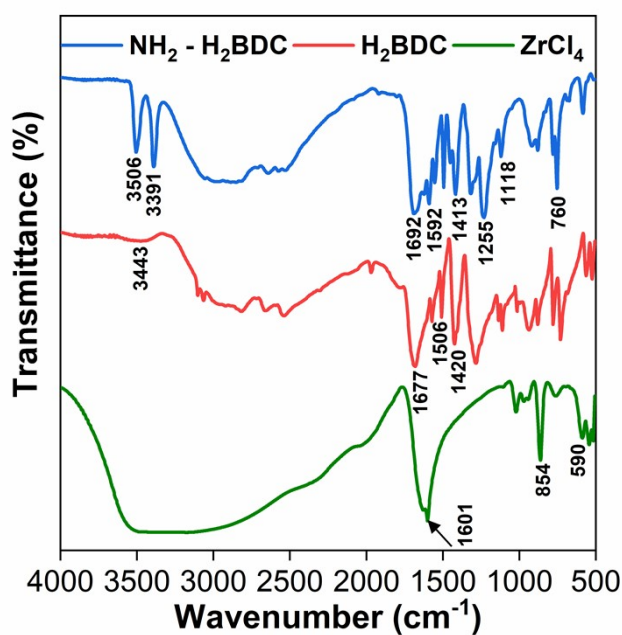

14

15 Fig. S12. FTIR spectra of ZrCl<sub>4</sub>, terephthalic acid, and 2-aminoterephthalic acid.

16

17

18 Section S3: XPS analysis

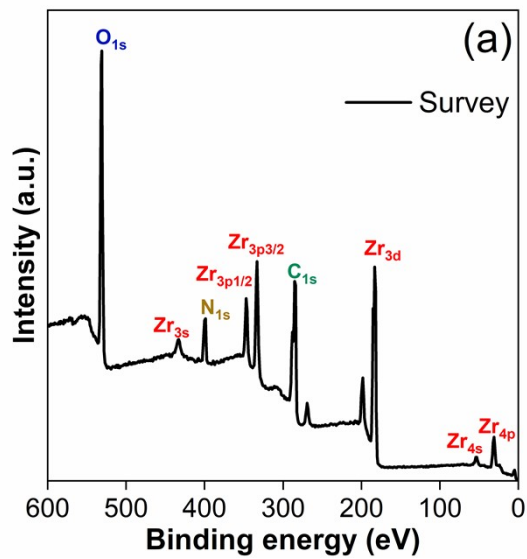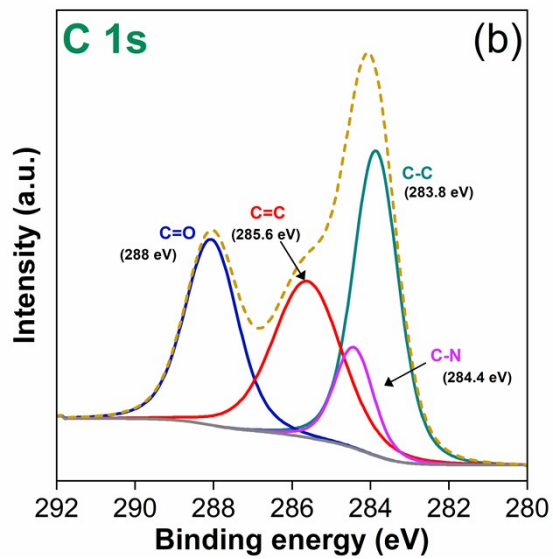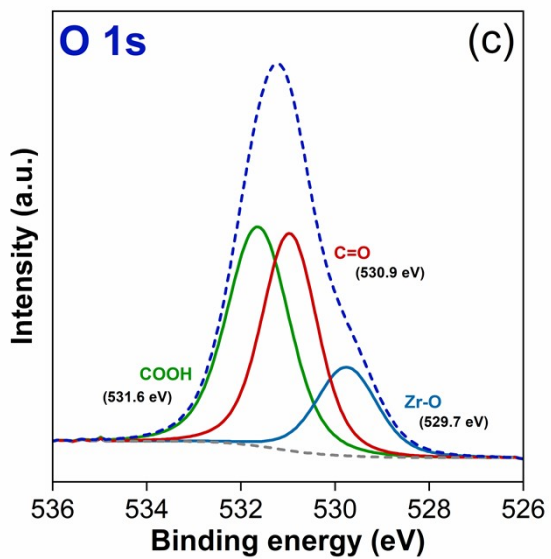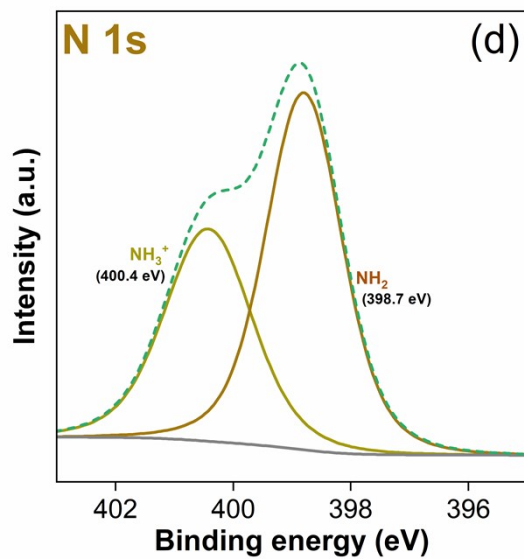

Fig. S13. XPS analysis of acetic acid modulated sample. (a) survey, (b) C, (c) O, and (d) N.



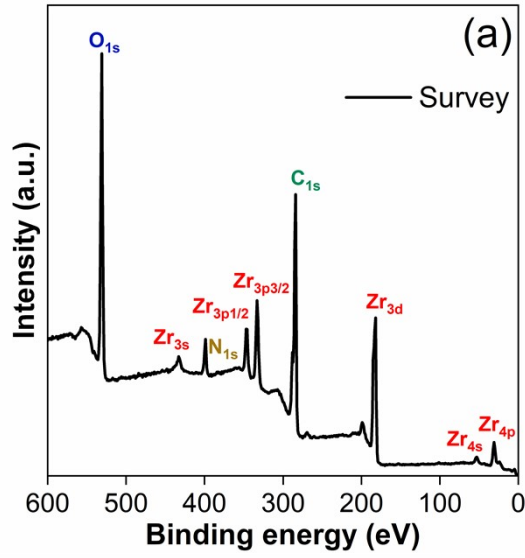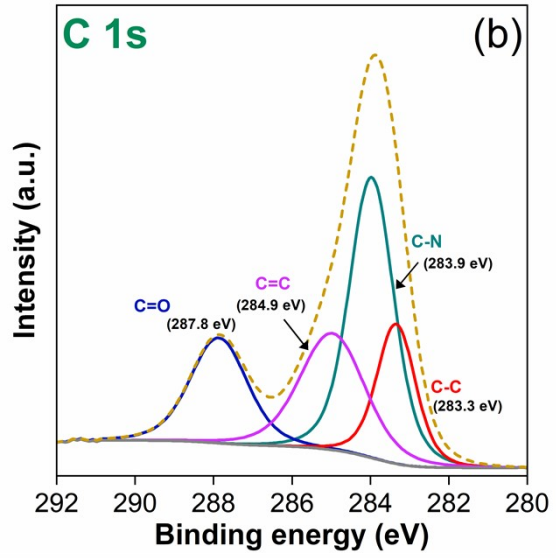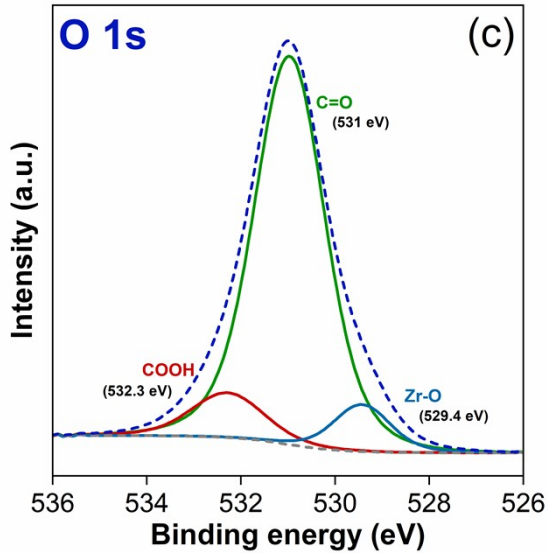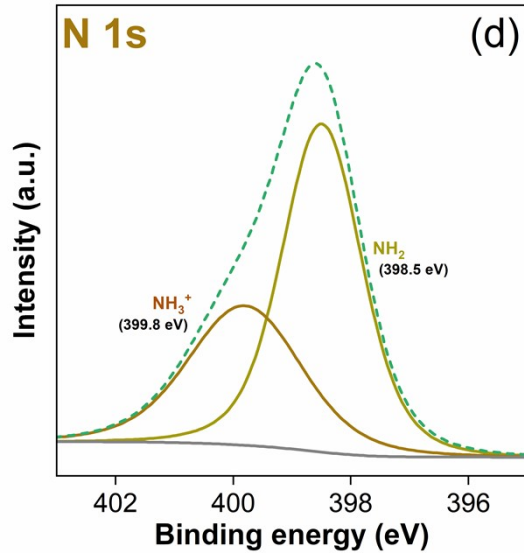

1

2

3 Fig. S14. XPS analysis of formic acid modulated sample. (a) survey, (b) C, (c) O, and (d) N.

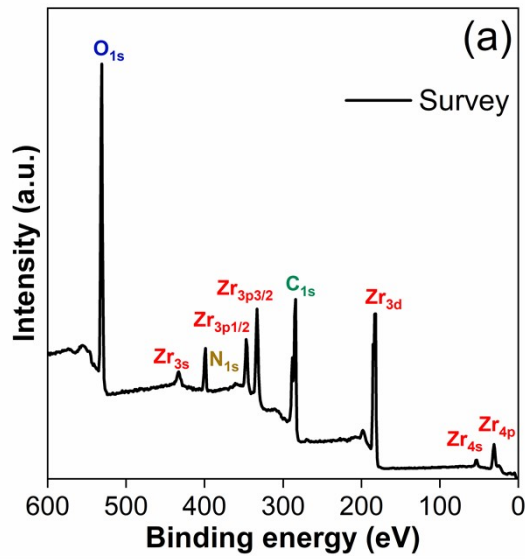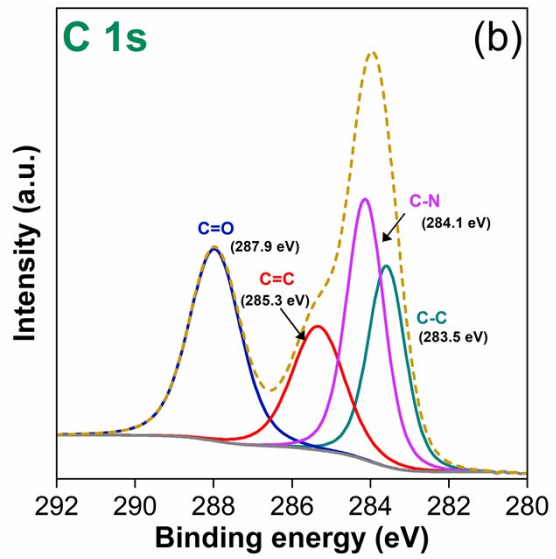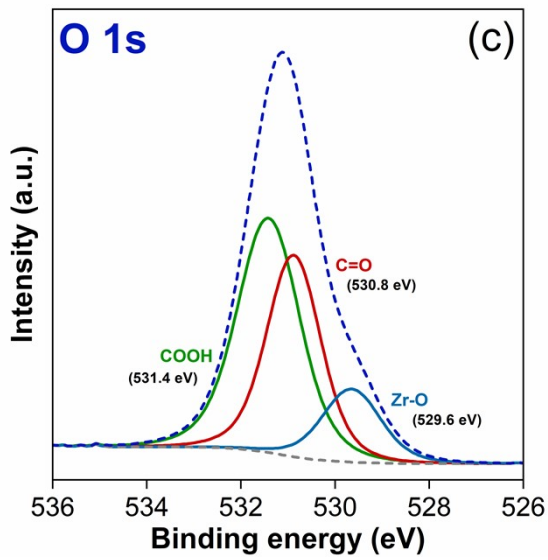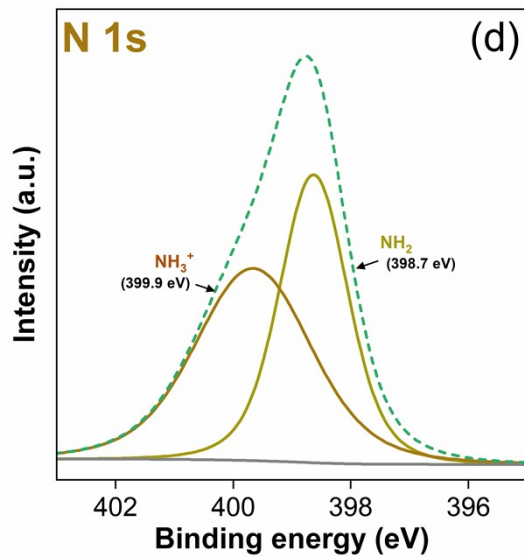

1

2

3 Fig. S15. XPS analysis of HCl modulated sample synthesized at 100°C. (a) survey, (b) C, (c) O, and  
4 (d) N.

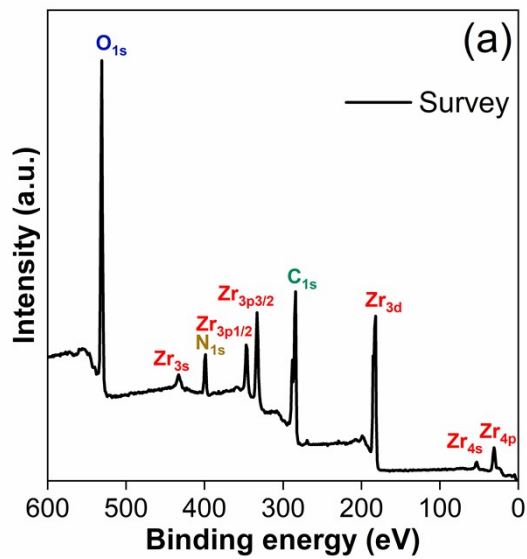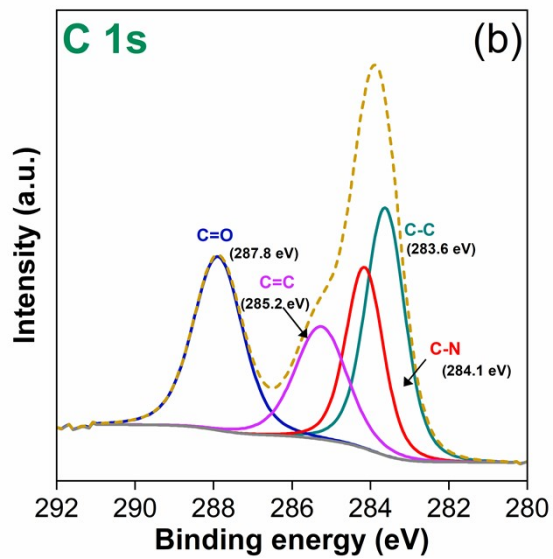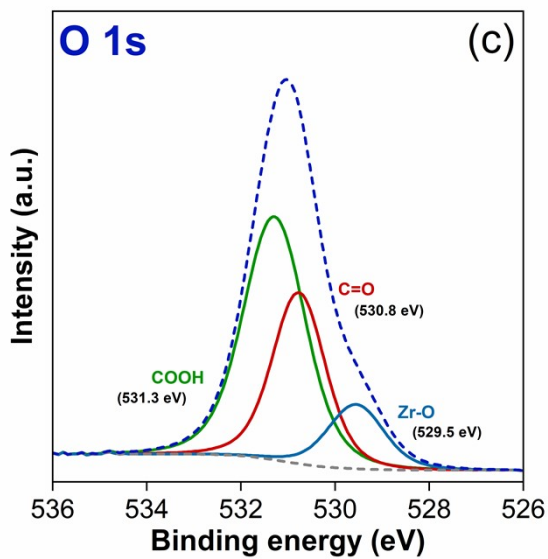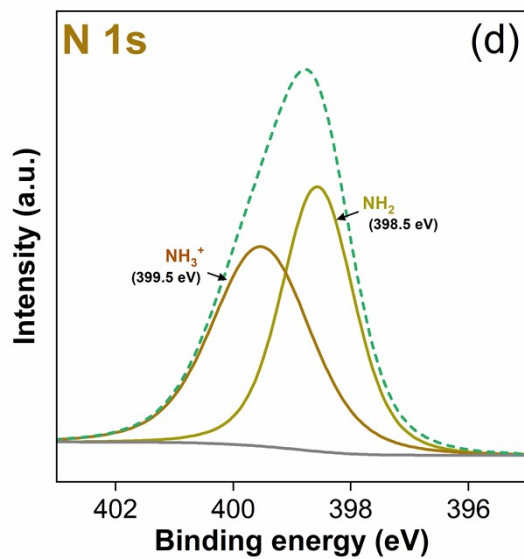

1

2

3 Fig. S16. XPS analysis of HCl modulated sample synthesized at 120°C. (a) survey, (b) C, (c) O, and  
4 (d) N.

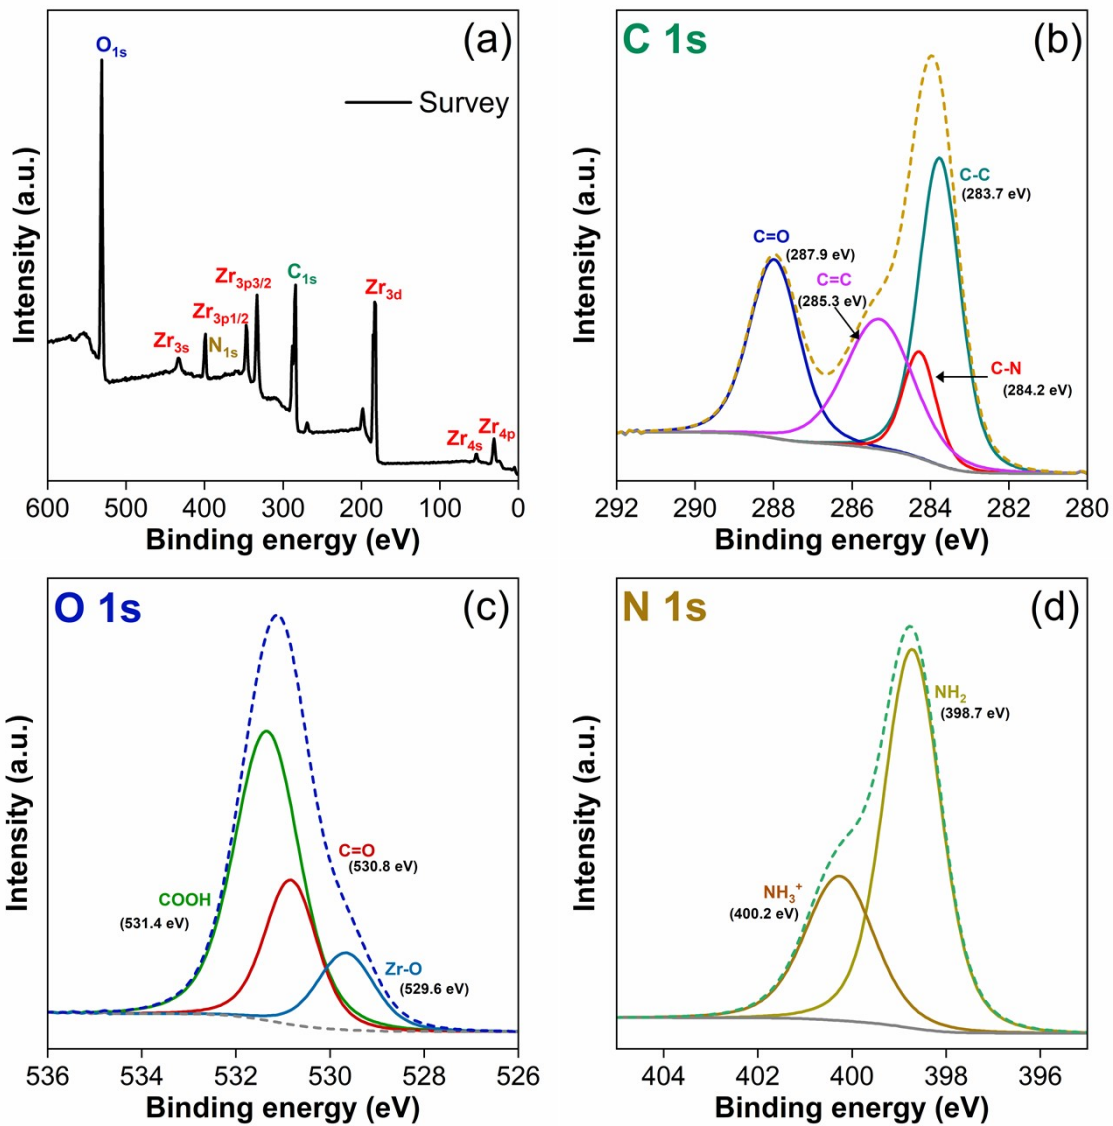

1

2

3 Fig. S17. XPS analysis of 4 equi. HCl modulated sample synthesized at 80°C. (a) survey, (b) C, (c) O,  
 4 and (d) N.

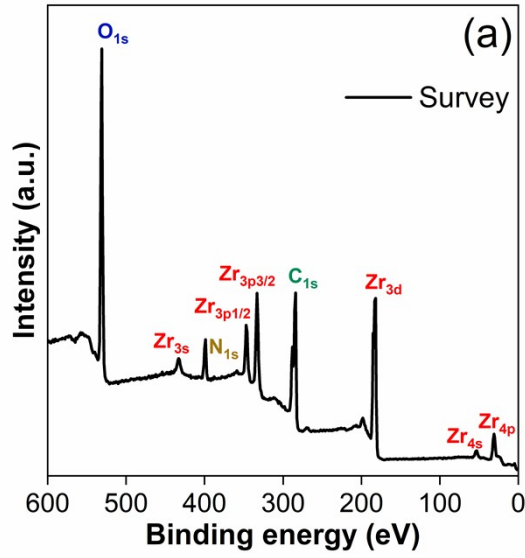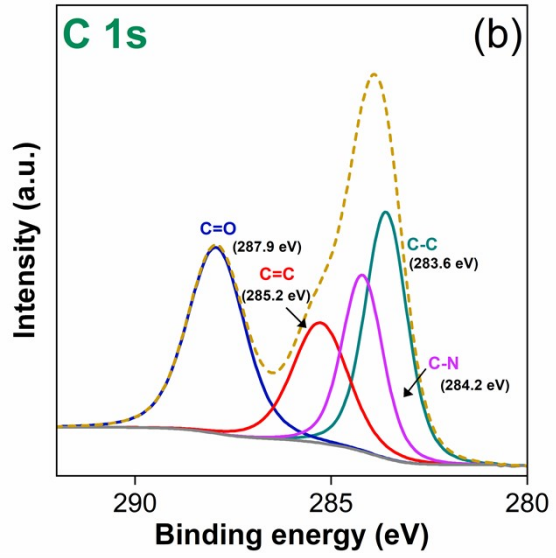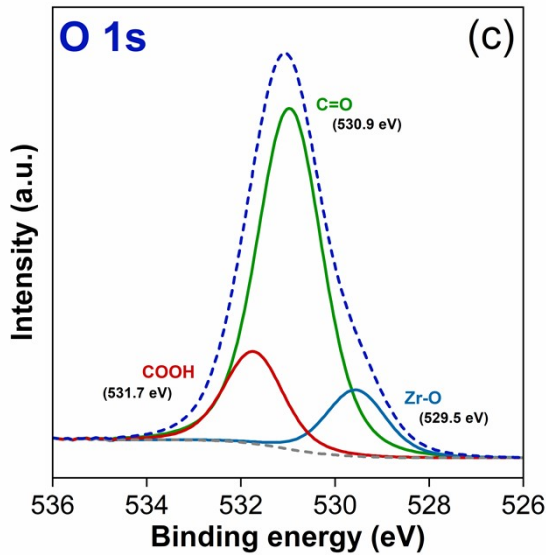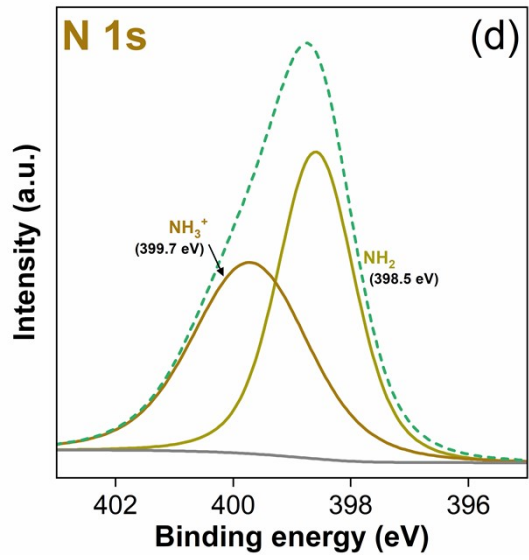

1

2

3 Fig. S18. XPS analysis of 12 equi. HCl modulated sample synthesized at 80°C. (a) survey, (b) C, (c)  
 4 O, and (d) N.

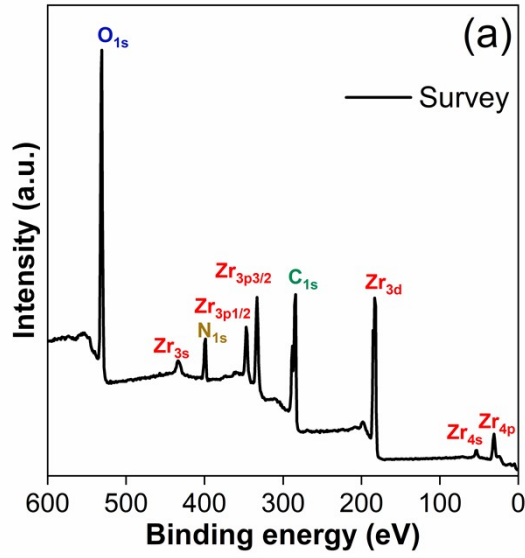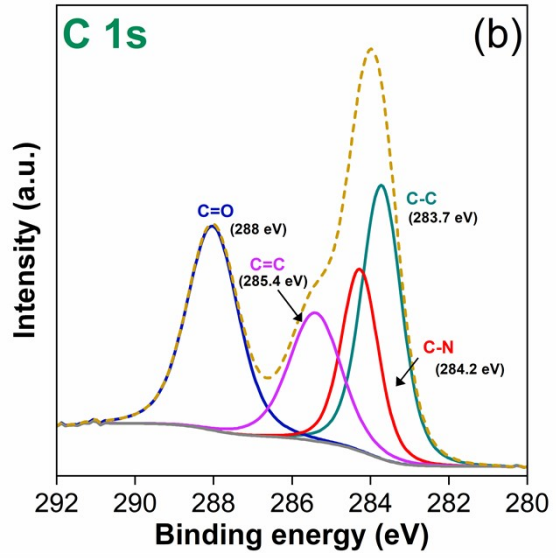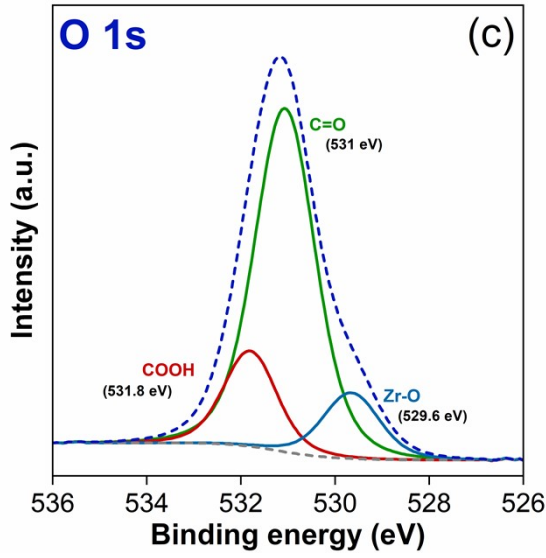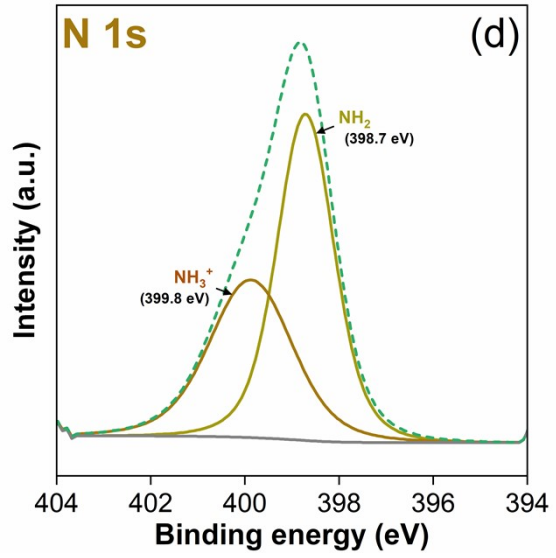

1

2

3 Fig. S19. XPS analysis of 8 equi. HCl modulated sample (8.4 NH<sub>2</sub>-H<sub>2</sub>BDC) synthesized at 80°C. (a)  
 4 survey, (b) C, (c) O, and (d) N.

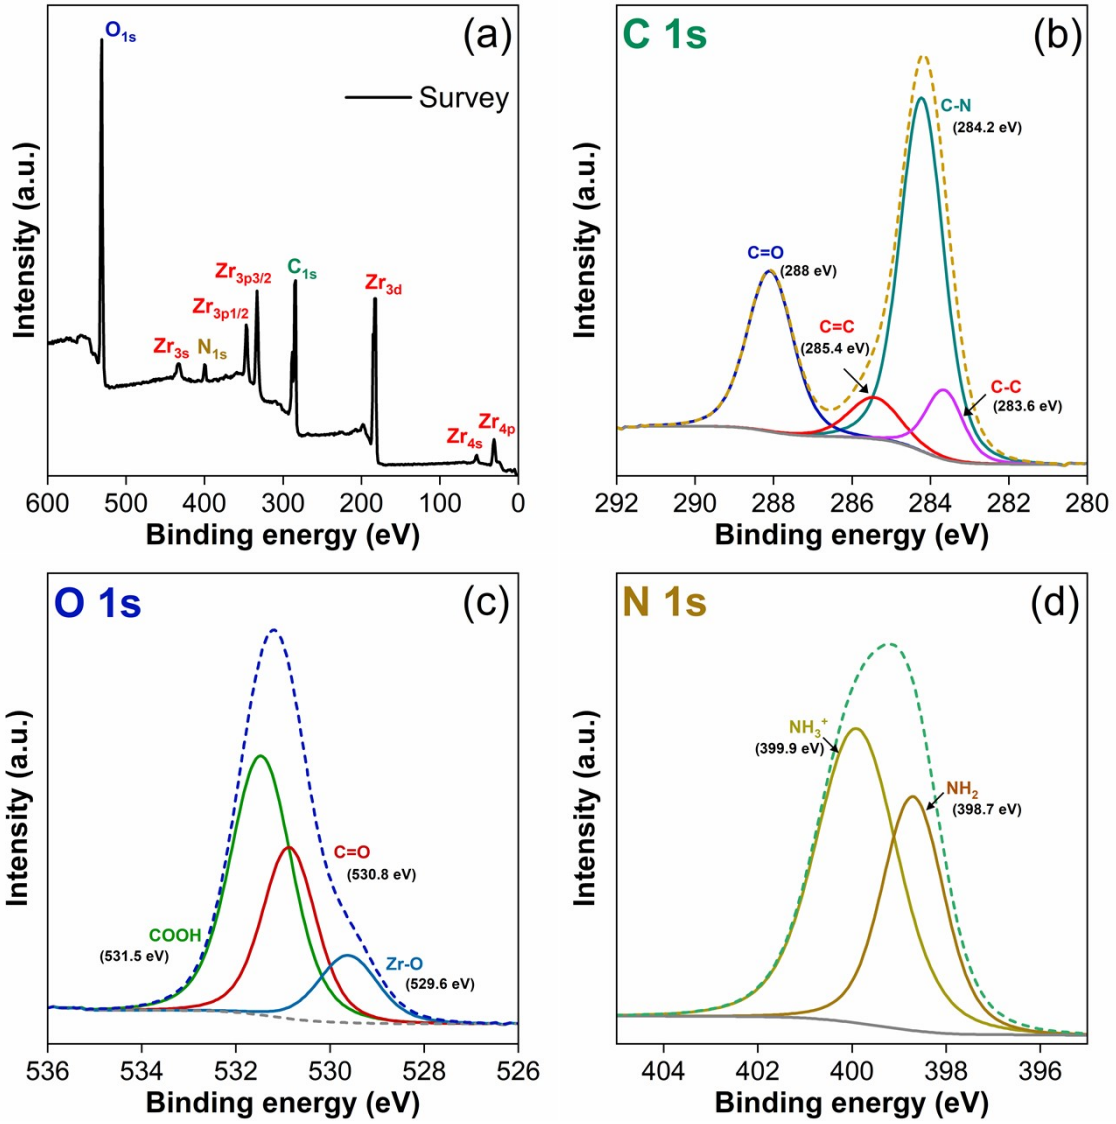

1

2

3 Fig. S20. XPS analysis of 8 equi. HCl modulated sample (2.1 NH<sub>2</sub>-H<sub>2</sub>BDC) synthesized at 80°C. (a)  
 4 survey, (b) C, (c) O, and (d) N.

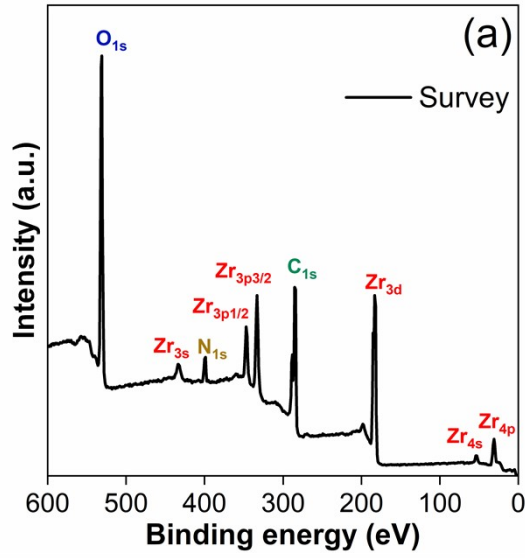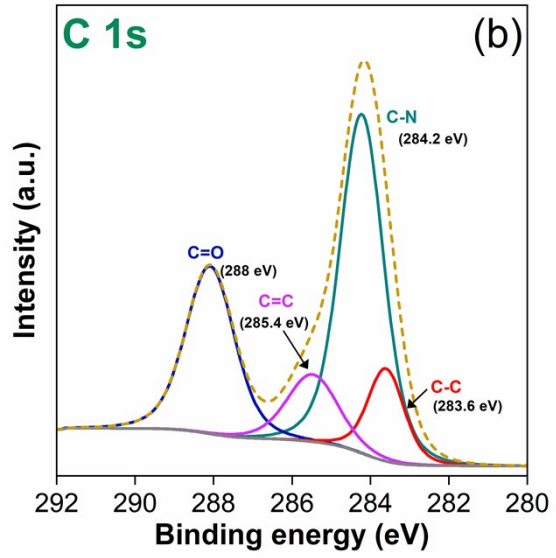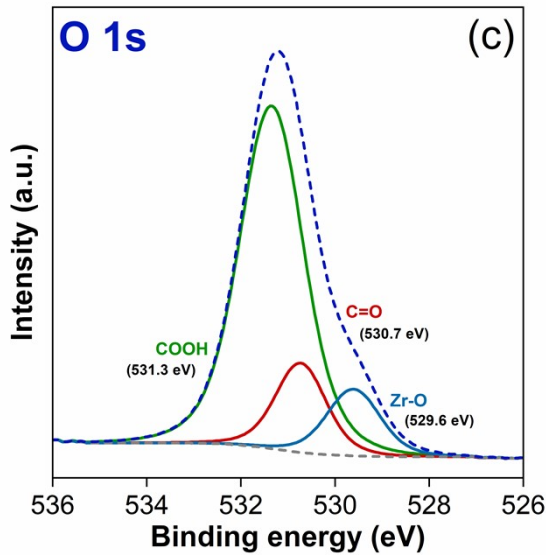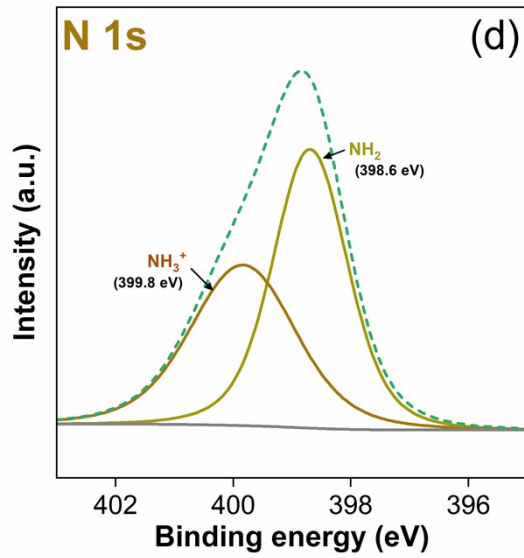

1

2

3 Fig. S21. XPS analysis of 8 equi. HCl modulated sample (4.2 NH<sub>2</sub>-H<sub>2</sub>BDC) synthesized at 80°C. (a)  
 4 survey, (b) C, (c) O, and (d) N.

5



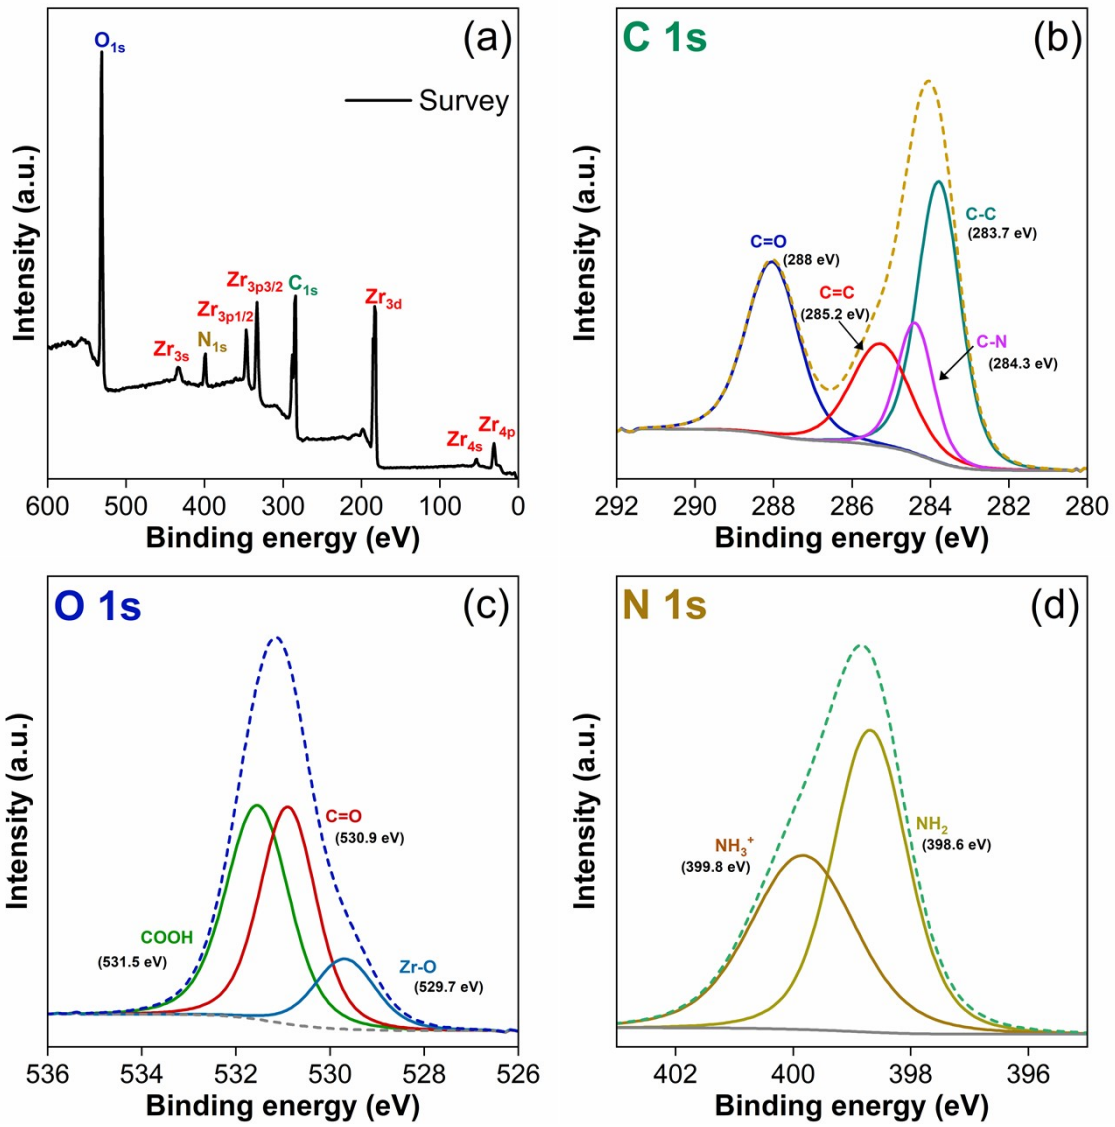

1

2

3 Fig. S22. XPS analysis of 8 equi. HCl modulated sample (6.3 NH<sub>2</sub>-H<sub>2</sub>BDC) synthesized at 80°C. (a)  
 4 survey, (b) C, (c) O, and (d) N.

1 Table S4. Calculated chemical composition of elements in UiO-66-NH<sub>2</sub> MOFs from XPS analysis.

2

| Sample | Zr 3d                        |                     | O 1S  |       |       | C 1S  |       |       |       | N 1S                         |                 |
|--------|------------------------------|---------------------|-------|-------|-------|-------|-------|-------|-------|------------------------------|-----------------|
|        | Zr3d <sub>5/2</sub>          | Zr3d <sub>3/2</sub> | COOH  | C=O   | Zr-O  | C=O   | C=C   | C-N   | C-C   | NH <sub>3</sub> <sup>+</sup> | NH <sub>2</sub> |
|        | <b>Modulator</b>             |                     |       |       |       |       |       |       |       |                              |                 |
| UN1    | 60.80                        | 39.20               | 43.96 | 38.69 | 17.35 | 25.66 | 28.10 | 10.26 | 35.98 | 40.48                        | 59.52           |
| UN2    | 59.56                        | 40.44               | 9.7   | 82.29 | 8.01  | 19.09 | 24.02 | 39.63 | 17.26 | 37.60                        | 62.40           |
| UN3    | 60.86                        | 39.14               | 17.12 | 70.31 | 12.57 | 30.19 | 19.32 | 19.13 | 31.36 | 41.20                        | 58.80           |
|        | <b>Synthesis Temperature</b> |                     |       |       |       |       |       |       |       |                              |                 |
| UN3    | 60.86                        | 39.14               | 17.12 | 70.31 | 12.57 | 30.19 | 19.32 | 19.13 | 31.36 | 41.20                        | 58.80           |
| UN4    | 60.88                        | 39.12               | 49.04 | 36.64 | 14.32 | 29.36 | 19.48 | 29.01 | 22.15 | 53.12                        | 46.88           |
| UN5    | 60.72                        | 39.28               | 54.31 | 32.69 | 13    | 27.76 | 19.00 | 21.81 | 31.43 | 50.67                        | 49.33           |
|        | <b>HCl Concentration</b>     |                     |       |       |       |       |       |       |       |                              |                 |
| UN6    | 60.82                        | 39.18               | 61.12 | 24.61 | 14.27 | 26.27 | 25.96 | 10.39 | 37.38 | 31.59                        | 68.41           |
| UN3    | 60.86                        | 39.14               | 17.12 | 70.31 | 12.57 | 30.19 | 19.32 | 19.13 | 31.36 | 41.20                        | 58.80           |
| UN7    | 60.61                        | 39.39               | 17.15 | 70.28 | 12.57 | 30.41 | 19.32 | 20.58 | 29.69 | 48.32                        | 51.68           |
|        | <b>Ligand Ratio</b>          |                     |       |       |       |       |       |       |       |                              |                 |
| UN8    | 61.01                        | 38.99               | 54.62 | 31.69 | 13.69 | 27.00 | 7.64  | 55.92 | 9.44  | 62.46                        | 37.54           |
| UN9    | 60.96                        | 39.04               | 73.09 | 15.06 | 11.85 | 27.54 | 11.58 | 49.53 | 11.35 | 44.79                        | 55.21           |
| UN10   | 60.87                        | 39.13               | 44.98 | 40.78 | 14.24 | 28.68 | 18.78 | 14.80 | 37.74 | 44.80                        | 55.20           |
| UN3    | 60.86                        | 39.14               | 17.12 | 70.31 | 12.57 | 30.19 | 19.32 | 19.13 | 31.36 | 41.20                        | 58.80           |

3

4

1 Table S5. Atomic % ratio of Zr, C, O and N elements from XPS analysis

2

| Sample Description                             | Atomic Percentage (%) |        |           |          | Stoichiometric values |      |      |
|------------------------------------------------|-----------------------|--------|-----------|----------|-----------------------|------|------|
|                                                | Carbon                | Oxygen | Zirconium | Nitrogen | C/Zr                  | O/Zr | N/Zr |
| UN1 - Acetic acid                              | 51.55                 | 32.84  | 6.47      | 9.14     | 7.96                  | 5.07 | 1.41 |
| UN2 - Formic acid                              | 60.70                 | 29.45  | 4.39      | 5.46     | 13.82                 | 6.76 | 1.24 |
| UN6 - 4 Equi. HCl                              | 52.32                 | 33.96  | 5.89      | 7.83     | 8.88                  | 5.76 | 1.32 |
| UN3 - 8 Equi. HCl                              | 50.93                 | 36.26  | 5.76      | 7.05     | 8.84                  | 6.29 | 1.22 |
| UN7 - 12 Equi. HCl                             | 50.44                 | 36.10  | 5.99      | 7.47     | 8.42                  | 6.02 | 1.24 |
| UN4 - 100°C                                    | 51.55                 | 35.03  | 5.61      | 7.81     | 9.18                  | 6.24 | 1.39 |
| UN5 -120°C                                     | 52.92                 | 34.51  | 5.37      | 7.20     | 9.85                  | 6.42 | 1.34 |
| UN8 - 2.1 NH <sub>2</sub> -H <sub>2</sub> BDC  | 52.68                 | 37.53  | 6.17      | 3.62     | 8.53                  | 6.08 | 0.58 |
| UN9 - 4.2 NH <sub>2</sub> -H <sub>2</sub> BDC  | 52.13                 | 37.12  | 6.02      | 4.74     | 8.65                  | 6.16 | 0.78 |
| UN10 - 6.3 NH <sub>2</sub> -H <sub>2</sub> BDC | 50.93                 | 36.31  | 5.75      | 7.01     | 8.85                  | 6.31 | 1.21 |

1 Section S5: Thermogravimetric analysis

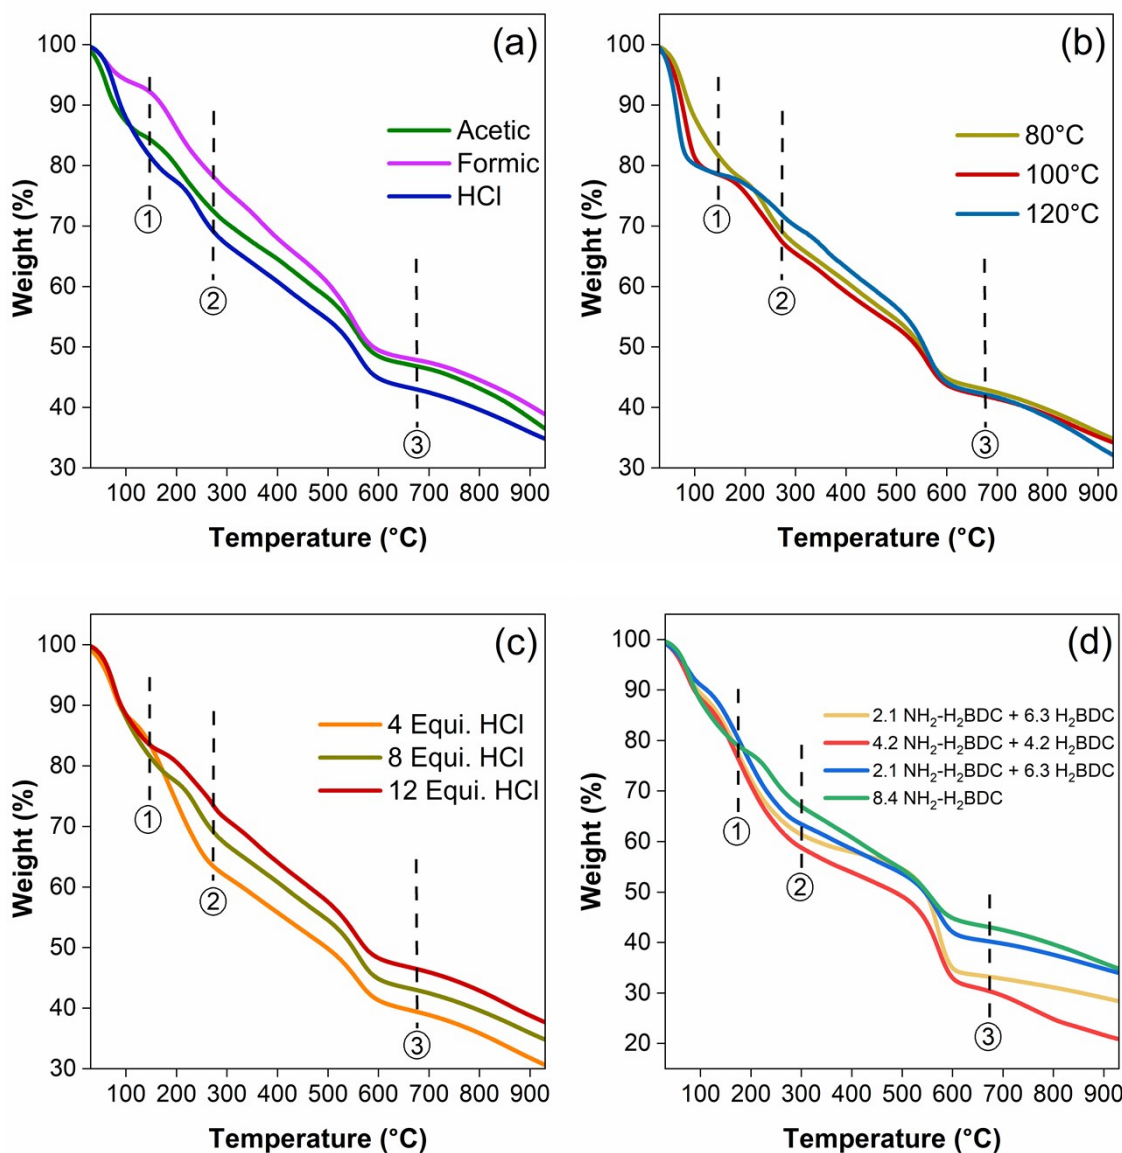

4 Fig. S23. TGA curve of UiO-66-NH<sub>2</sub> samples to its synthesis condition: (a) various modulators,  
5 (b) synthesis temperature, (c) HCl equivalence, and (d) ligand composition.

6

7

8

9

10

11

12

1 Table S6. Calculated weight loss and missed linker values from TGA curve.

| <i>Sample description</i>           | <b>Weight loss<sub>exp</sub> %</b> | <b>N<sub>missed linkers</sub></b> | <b>Final residue (wt. %)</b> |
|-------------------------------------|------------------------------------|-----------------------------------|------------------------------|
| <b><i>Modulator<br/>8 Equi.</i></b> | Acetic                             | 195.95                            | 36.04                        |
|                                     | Formic                             | 197.73                            | 38.42                        |
|                                     | HCl                                | 194.17                            | 34.50                        |
| <b><i>T-80°C</i></b>                | 4 Equi. HCl                        | 203.88                            | 30.33                        |
|                                     | 8 Equi. HCl                        | 194.17                            | 34.50                        |
|                                     | 12 Equi. HCl                       | 190.27                            | 37.37                        |
| <b><i>8 Equi. HCl</i></b>           | 80°C                               | 194.17                            | 34.50                        |
|                                     | 100°C                              | 193.04                            | 33.97                        |
|                                     | 120°C                              | 221.40                            | 31.71                        |

1 Section S6: N<sub>2</sub> adsorption-desorption analysis

2

3 Table S7. Estimated BET surface area, pore volume and pore size of as-synthesized UiO-66-NH<sub>2</sub> samples.

4

| <i>Sample description</i>           | <b>BET surface area (m<sup>2</sup>/g)</b> | <b>Pore size (nm)</b> | <b>V<sub>total</sub> pore volume (cm<sup>3</sup>/g)</b> | <b>Micropore volume (cm<sup>3</sup>/g)</b> | <b>Mesopore volume (cm<sup>3</sup>/g)</b> | <b>Micropores %</b> | <b>Mesopores %</b> |    |
|-------------------------------------|-------------------------------------------|-----------------------|---------------------------------------------------------|--------------------------------------------|-------------------------------------------|---------------------|--------------------|----|
| <b>Modulator</b><br><b>8 Equi.</b>  | Acetic                                    | 553                   | 10.6                                                    | 0.425264                                   | 0.224791                                  | 0.200473            | 53                 | 47 |
|                                     | Formic                                    | 568                   | 8.5                                                     | 0.394475                                   | 0.234044                                  | 0.160431            | 59                 | 41 |
|                                     | HCl                                       | 562                   | 8.8                                                     | 0.386850                                   | 0.240214                                  | 0.146636            | 62                 | 38 |
| <b>T-80°C</b>                       | 4 Equi. HCl                               | 578                   | 8.2                                                     | 0.374873                                   | 0.254962                                  | 0.119911            | 68                 | 32 |
|                                     | 8 Equi. HCl                               | 562                   | 8.8                                                     | 0.386850                                   | 0.240214                                  | 0.146636            | 62                 | 38 |
|                                     | 12 Equi. HCl                              | 742                   | 5.4                                                     | 0.437024                                   | 0.321167                                  | 0.115857            | 74                 | 26 |
| <b>8 Equi. HCl</b>                  | 80°C                                      | 562                   | 8.8                                                     | 0.386850                                   | 0.240214                                  | 0.146636            | 62                 | 38 |
|                                     | 100°C                                     | 562                   | 6.4                                                     | 0.342057                                   | 0.246694                                  | 0.095363            | 72                 | 28 |
|                                     | 120°C                                     | 499                   | 5.5                                                     | 0.288414                                   | 0.223562                                  | 0.064852            | 78                 | 22 |
| <b>Linker</b><br><b>Composition</b> | 2.1* + 6.3#                               | 675                   | 6.5                                                     | 0.417081                                   | 0.291388                                  | 0.125693            | 70                 | 30 |
|                                     | 4.2* + 4.2#                               | 623                   | 7.3                                                     | 0.401946                                   | 0.261394                                  | 0.140552            | 65                 | 35 |
|                                     | 6.3* + 2.1#                               | 574                   | 7.7                                                     | 0.376547                                   | 0.245985                                  | 0.130562            | 65                 | 35 |
|                                     | 8.4#                                      | 562                   | 8.8                                                     | 0.386850                                   | 0.240214                                  | 0.146636            | 62                 | 38 |

5

6 \* NH<sub>2</sub>-H<sub>2</sub>BDC # H<sub>2</sub>BDC

7

1 Section S7: p-nitrophenoxide calibration studies

2

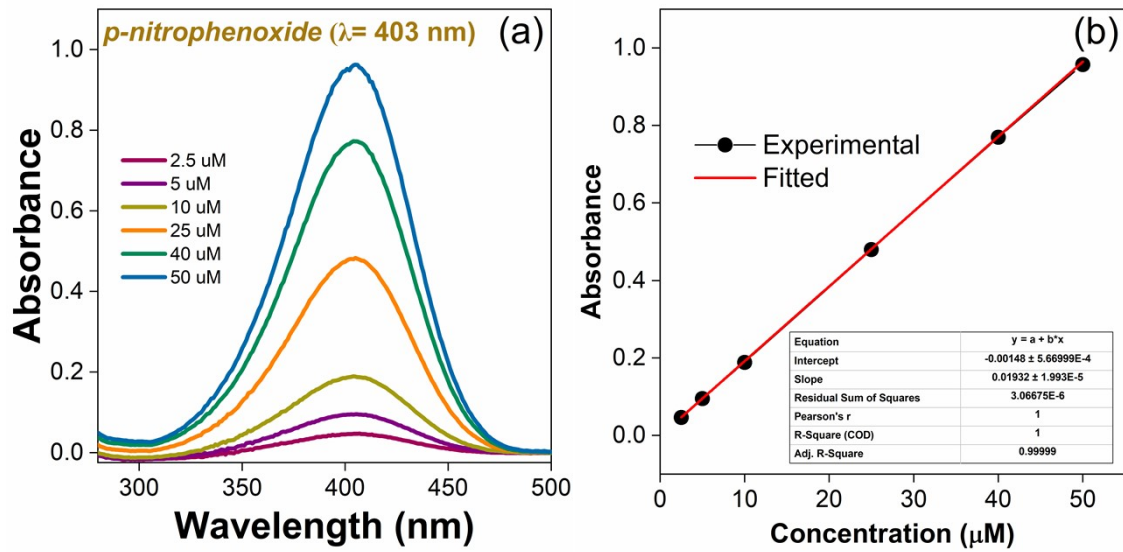

3

4 Fig. S24. Calibration curve of p-nitrophenoxide for the concentration between 2.5 and 50  $\mu\text{M}$ .

6
